1    **Circadian Regulation of Vertebrate Cone Photoreceptor**  
2    **Function**

3  
4    Jingjing Zang<sup>1</sup>, Matthias Gesemann<sup>1</sup>, Jennifer Keim<sup>1</sup>, Marijana Samardzija<sup>2</sup>, Christian  
5    Grimm<sup>2</sup>, Stephan C.F. Neuhauss<sup>1\*</sup>

6  
7    University of Zurich, Department of Molecular Life Sciences, Zurich, Switzerland

8    Lab for Retinal Cell Biology, Department of Ophthalmology, University Hospital Zurich,  
9    University of Zurich, Switzerland

10

11

12    \*corresponding author:

13    Department of Molecular Life Sciences, University of Zurich, Winterthurerstrasse 190, CH-

14    8057 Zurich, Switzerland

15    [stephan.neuhauss@mls.uzh.ch](mailto:stephan.neuhauss@mls.uzh.ch)

16

17

18

19

20

21

22

23

24

25

26

27

28

29

30

31

32

33

34    **Acknowledgements**

35    We like to thank Kara Kristiansen and Martin Walther for expert animal maintenance.

36

37

38

39    **Conflict of Interest**

40    The authors declare no conflict of interest.

1

## 2 **Abstract**

3 Eukaryotes generally display a circadian rhythm as an adaptation to the reoccurring day/night  
4 cycle. This is particularly true for visual physiology that is directly affected by changing light  
5 conditions. Here we investigate the influence of the circadian rhythm on the expression and  
6 function of visual transduction cascade regulators in diurnal zebrafish and nocturnal mice. We  
7 focused on regulators of shut-off kinetics such as *recoverins*, *arrestins*, *opsin kinases*, and  
8 *GTPase-accelerating protein* that have direct effects on temporal vision. Transcript as well as  
9 protein levels of most analyzed genes show a robust circadian rhythm dependent regulation,  
10 which correlates with changes in photoresponse kinetics. Electroretinography demonstrates  
11 that photoresponse recovery in zebrafish is delayed in the evening and accelerated in the  
12 morning. This physiological rhythmicity is mirrored in visual behaviors, such as optokinetic  
13 and optomotor responses. Functional rhythmicity persists in continuous darkness, it is  
14 reversed by an inverted light cycle and disrupted by constant light. This is in line with our  
15 finding that orthologous gene transcripts from diurnal zebrafish and nocturnal mice are often  
16 expressed in an anti-phasic daily rhythm.

## 1 **Introduction**

2 Circadian rhythms serve as endogenous clocks that molecularly support the daily occurring  
3 oscillations of physiology and ensuing behavior (Brown *et al*, 2019; Cahill, 2002; Frøland  
4 Steindal & Whitmore, 2019; Golombek *et al*, 2014; Idda *et al*, 2012; Ukai & Ueda, 2010; Vatine  
5 *et al*, 2011). It has long been recognized that the central pacemaker of circadian rhythms  
6 resides in dedicated brain regions, either the suprachiasmatic nucleus in mammals or the  
7 pineal gland in non-mammalian vertebrates. The rhythm is entrained by external stimuli (e.g.  
8 light) that directly acts on the core circadian transcriptional feedback loop. Multiple studies  
9 have shown that autonomous circadian clocks also exist in other brain regions and in  
10 peripheral tissues (Frøland Steindal & Whitmore, 2019; Idda *et al*, 2012; Vatine *et al*, 2011).  
11 This is particularly true for the retina, which generates its own circadian rhythm (Ko, 2020). In  
12 zebrafish this rhythmicity is reflected in a number of circadian adaptations, such as a higher  
13 response threshold in the morning (Li & Dowling, 1998), photoreceptor retinomotor  
14 movement in constant darkness (Menger *et al*, 2005) and cone photoreceptor synaptic ribbon  
15 disassembly at night (Emran *et al*, 2010). Such adaptations are also found in other animals  
16 such as mice where stronger electrical retinal coupling during the night (Jin *et al*, 2015; Li *et*  
17 *al*, 2009; Ribelayga *et al*, 2008), as well as slower dark adaptation of rods during the day was  
18 observed (Xue *et al*, 2015). The molecular mechanisms underlying these circadian dependent  
19 retinal regulations are still largely unknown.

20 In the vertebrate retina there are two different types of photoreceptors, namely rods and  
21 cones (Burns & Baylor, 2001; Fu & Yau, 2007). Rods function mainly during dim light  
22 conditions, whereas cones are characterized by lower sensitivity but faster response kinetics  
23 being important for daylight and color vision. About 92% of larval and 60% of adult  
24 photoreceptors in the zebrafish retina are cones (Allison *et al*, 2010; Fadool, 2003;

1 Zimmermann *et al*, 2018). Although rods and cones generally use the same visual  
2 transduction cascade components, the individual reactions are typically mediated by  
3 photoreceptor type specific proteins.

4 Visual transduction commences by an opsin chromophore mediated absorption of photons,  
5 which triggers the activation of a second messenger cascade including the trimeric G-protein  
6 transducin. Activated transducin stimulates the effector enzyme phosphodiesterase (PDE),  
7 which leads to a reduction of intracellular cGMP levels, subsequently leading to the closure  
8 of CNG-gated cation channels resulting in a membrane potential change (Fain *et al*, 2001;  
9 Lamb & Pugh, 2006).

10 High-temporal resolution requires a tightly regulated termination of visual transduction (Chen  
11 *et al*, 2012; Matthews & Sampath, 2010; Zang & Matthews, 2012). This depends on the highly  
12 effective quenching of both the activated visual pigment (R\*) and PDE-transducin complex  
13 (PDE\*). R\* are phosphorylated by a G-protein receptor kinase (GRK) before being completely  
14 deactivated by binding to arrestin. While GRK activity itself is controlled by recoverin (RCV) in  
15 a Ca<sup>2+</sup>-dependent manner (Zang & Neuhauss, 2018), the quenching of PDE\* depends on the  
16 GTPase activity of its  $\gamma$ -subunit that is regulated by activator protein RGS9 (Regulator of G-  
17 protein Signaling 9)(Krispel *et al*, 2006).

18 We now show that the expression levels of these important regulators of cone visual  
19 transduction decay are modulated by the circadian clock. Moreover, these periodic  
20 fluctuations are reflected in oscillating protein levels that correlate with the rhythmicity in  
21 visual physiology and behavior observed in zebrafish. Interestingly, we found that the  
22 expression of a selection of mouse orthologes of the investigated regulatory genes are also  
23 modulated by the circadian clock. However, the periodicity was opposite to zebrafish, fitting  
24 the nocturnal lifestyle of mice.

## 1 **Results**

### 2 **Expression levels of key genes involved in shaping visual transduction decay are regulated** 3 **by the circadian clock**

4 In order to determine the influence of the circadian clock on visual behavior, we analyzed  
5 gene expression levels of key visual transduction regulators over a 24-hour-period using  
6 quantitative real time PCR (qRT-PCR). Eyes from larval (5 dpf) and adult zebrafish that were  
7 kept under a normal light cycle (LD), as well as eyes from 5 dpf larvae kept in continuous  
8 darkness (DD), were collected every 3 hours over a period of 24 hours and subsequently  
9 analyzed. Apart from *rcv2a* which seems to have no fluctuating transcript levels in larvae  
10 (Figure 1I), expression levels of the other *recoverins* (*rcv1a*, *rcv1b* which is absent from larval  
11 retina and *rcv2b*), *G-protein receptor kinases* (*grk7a* and *grk7b*), *arrestins* (*arr3a* and *arr3b*)  
12 and *regulator of G-protein signaling 9* (*rgs9a*) were clearly oscillating (Figure 1, supplement  
13 table 1). In many cases, transcripts were most abundant in the morning (*grk7a*, *grk7b* and  
14 *rgs9a*) or at midday (*rcv2b*, *arr3a* and *arr3b*), subsequently declined throughout the day and  
15 recovering during the night. For instance, in adult zebrafish eyes *grk7a* expression levels  
16 decreased by around 98% from peak expression to lowest expression levels (Figure 1A). *In*  
17 *situ* hybridization (ISH) analysis using digoxigenin labeled RNA probes validated our qRT-PCR  
18 results (Figure 1- figure supplement 2&3).

19 Interestingly, two genes, namely *rcv1a* and *rcv2a*, displayed different expression profiles in  
20 larval and adult eyes (Figure 1G,I). While larval *rcv1a* mRNA transcript levels peaked around  
21 midnight, larval *rcv2a* transcript expression was non-cyclic (Figure 1G,I). However, this is in  
22 contrast to adult retinas where *rcv1a* and *rcv2a* transcripts were highest at midday (Figure  
23 1G). An anti-phasic expression profile between larval and adult stages can also be observed  
24 for rod *arrestin* (*arras*) (Figure 1-figure supplement 4).

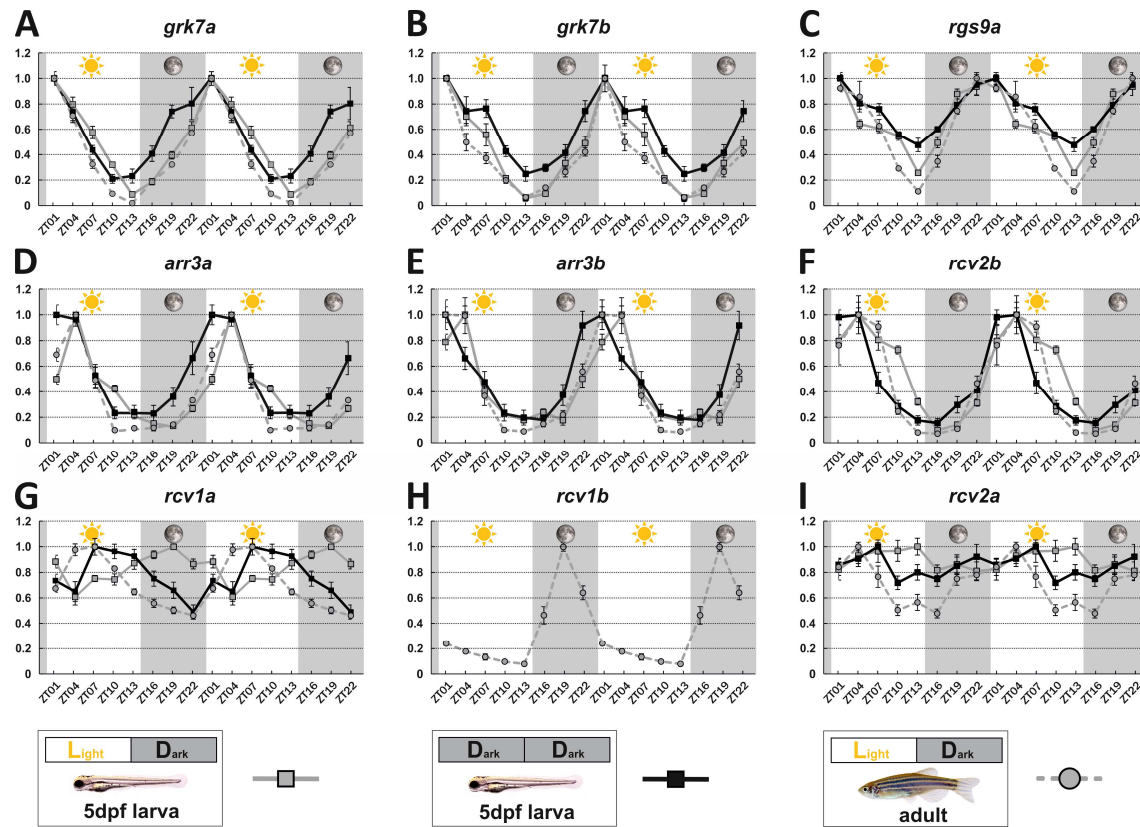

1

2 **Figure1. Key visual transduction decay gene transcripts are under circadian control.**

3 mRNA levels of visual transduction decay genes in the eye of adult and larval zebrafish were  
 4 measured by qRT-PCR over a 24-hour-period and the data was duplicated in a 48-hour-time  
 5 scale. (A-I). Eye tissues from larval fish either raised under a normal light/dark cycle (LD / gray  
 6 squares) or in continuous darkness (DD / black squares) and from adult LD zebrafish (gray  
 7 circles) were collected at eight different time points throughout the day. The name of the  
 8 analyzed gene transcripts is given on top of each graph. The time point of collection is  
 9 indicated along the x-axis with ZT01 being the time point one hour after the light was turned  
 10 on. Dark periods are indicated by the moon symbol and highlighted in gray, whereas the  
 11 periods under regular light conditions are indicated by the sun symbol and shown in white.  
 12 For better orientation the different conditions are summarized at the bottom of the figure.  
 13 Data represents the mean  $\pm$  standard error of the mean (s.e.m) of three or more independent  
 14 measurements. Statistics information is provided in Supplementary file 1.

15

16

1 In order to establish that the daily expression changes of these transcripts are indeed  
2 regulated by the intrinsic circadian clock, we repeated our experiments in larvae kept in  
3 complete darkness (DD), eliminating light as an external factor. Under normal LD as well as  
4 DD conditions we obtained largely comparable results (Figure 1), although there was a 3-  
5 hour-phase shift in both *arr3a* and *arr3b* (Figure 1C&D).

6

### 7 **Corresponding retinal genes in nocturnal mice display an anti-phasic expression pattern**

8 As zebrafish are diurnal animals having a cone dominant retina, we wondered if the observed  
9 circadian regulation of visual transduction gene transcripts is also seen in the rod dominant  
10 retina of nocturnal mice. We selected mouse *Grk1*, the only visual grk gene in mice (Chen *et*  
11 *al*, 1999; Wada *et al*, 2006), the sole recoverin (Chen *et al.*, 2012) and Rgs9 (Krispel *et al.*, 2006)  
12 genes and the two arrestins *Arr1* and *Arr3*, as the counterparts for the above mentioned  
13 zebrafish genes for our analysis.

14 Expression of all five regulators fluctuated in a 24-hour-period (Figure 2), being highest at the  
15 beginning of the dark period (ZT13) for the two *arrestins* (Figure. 2A&B), or around midnight  
16 (ZT17) for *Grk1*, *Rgs1* and *Rcv1*. All of them displayed minimal transcript levels early during  
17 the day. This oscillation pattern shows a clear anti-phasic relationship with the cyclic  
18 fluctuation of the corresponding zebrafish transcripts. Curiously, the amplitude of gene  
19 fluctuation in adult zebrafish retina was generally larger than in the mouse retina (Figures  
20 1&2).

21 Despite the rhythmic expression in both zebrafish and mice, our bioinformatics search did not  
22 discover conserved transcription factor binding sites of known core circadian regulators in  
23 any of the tested genes (Figure 2-figure supplement 1).

24

1

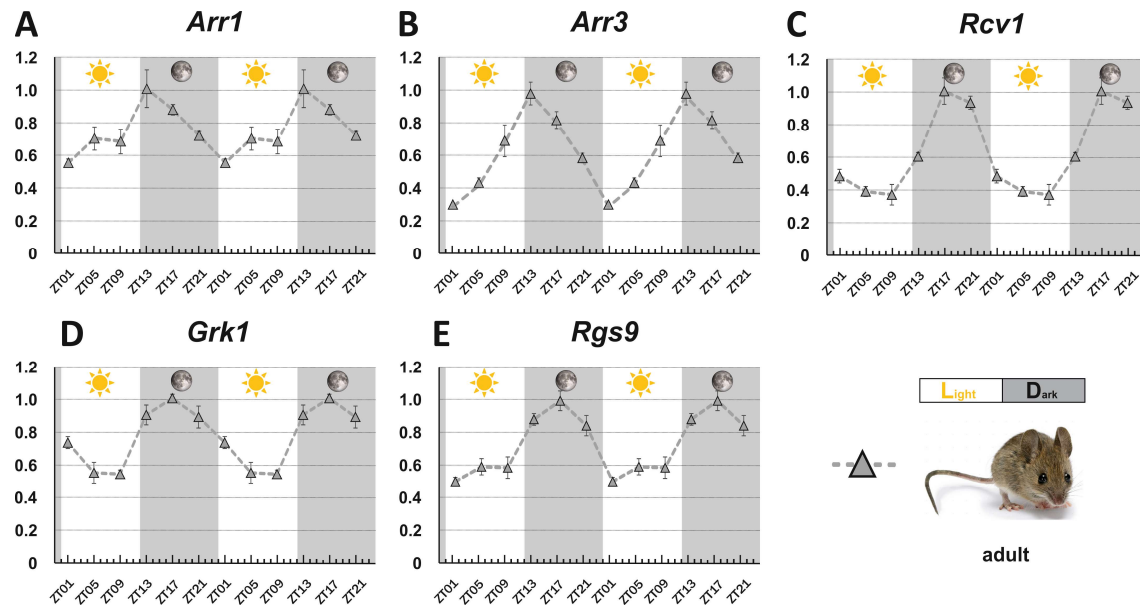

2

3

4 **Figure 2. Circadian regulation of key visual transduction genes in nocturnal mice is reversed.**

5 Transcript levels of indicated mouse genes were measured using qRT-PCR on retinal tissue  
6 of 12-week-old wildtype mice. The time point of collection is indicated along the x-axis with  
7 ZT01 being the time point one hour after the light was turned on. The data was duplicated in  
8 a 48-hour-time scale. Dark periods are indicated by the moon symbol and highlighted in  
9 gray, whereas the periods under regular light conditions are indicated by the sun symbol  
10 and shown in white. Data represents the mean  $\pm$  s.e.m of three independent  
11 measurements. One-way ANOVA was performed by GraphPad Prism 8.  $p=0.018$  at ZT13,  
12  $p=0.008$  at ZT17 and  $p=0.001$  at ZT21 compared with the lowest point at ZT1 (A).  $p=0.015$  at  
13 ZT5,  $p=0.015$  at ZT9,  $p<0.001$  at ZT13,  $p<0.001$  at ZT17 and  $p<0.001$  at ZT21 compared with  
14 the lowest point at ZT1 (B).  $p=0.014$  at ZT13,  $p=0.022$  at ZT17 and  $p<0.001$  at ZT21  
15 compared with the lowest level at ZT9 (C).  $p=0.011$  at ZT1,  $p=0.005$  at ZT13,  $p<0.001$  at ZT17  
16 and  $p=0.008$  at ZT21 compared with the lowest point at ZT9 (D).  $p<0.001$  at ZT13,  $p=0.001$   
17 at ZT17 and  $p=0.007$  at ZT21 compared with the lowest level at ZT1 (E).



## 1 **Levels of key visual transduction regulator proteins fluctuate in the zebrafish retina**

2 While mRNA half-life is typically in the range of minutes, protein turnover rates can range  
3 from minutes to days, explaining why fluctuation of mRNA levels are not always reflected in  
4 time-shifted oscillations at the protein level (Cunningham & Gonzalez-Fernandez, 2000;  
5 Stenkamp *et al*, 2005). However, as regulatory proteins often have turnover rates of only a  
6 few hours we were examining whether RNA oscillations are mirrored by corresponding  
7 protein level fluctuations. In order to assess protein levels, we generated paralogue-specific  
8 antibodies against GRK7a and ARR3a. Quantitative Western blot analysis indicated periodic  
9 changes in protein levels for both proteins. Peak expression was shifted 6 to 12 hours  
10 between RNA and protein levels (Figure 3A, 3B). ARR3a reached its highest and lowest levels  
11 at ZT7 and ZT22, respectively, whereas GRK7a maintained relatively high levels throughout  
12 the day having the lowest concentrations around midnight. Hence, mRNA circadian  
13 oscillations in the zebrafish retina are largely conserved at the protein level with a time shift.

14

## 15 **Larval cone response recovery is delayed in the evening**

16 We next asked whether the observed protein and RNA level fluctuations have an impact on  
17 functional aspects of visual transduction. In the electroretinogram (ERG) the a-wave directly  
18 represents photoreceptor responses. Since in the zebrafish ERG it is largely masked by the  
19 larger b-wave, reflecting the depolarization of ON-bipolar cells, we used the b-wave  
20 amplitude as an indirect measure of the cone photoresponse (Figure 4A1). The protein  
21 products of the genes analyzed in our study are known to affect photoresponse recovery in  
22 zebrafish (Renninger *et al*, 2011; Rinner *et al*, 2005; Zang *et al*, 2015). Therefore, we assessed  
23 their function by using the ERG double flash paradigm. In this experimental set-up, the retina  
24 receives a conditioning flash followed by a probing flash of the same light intensity (Figure

1 4A1). The b-wave amplitude ratio of probing to conditioning response in relation to the  
 2 interstimulus interval is a normalized read-out for the visual transduction recovery time  
 3 (Figure 4A2). Photoreceptor recovery is complete when the two flashes evoke responses of  
 4 equal amplitudes.

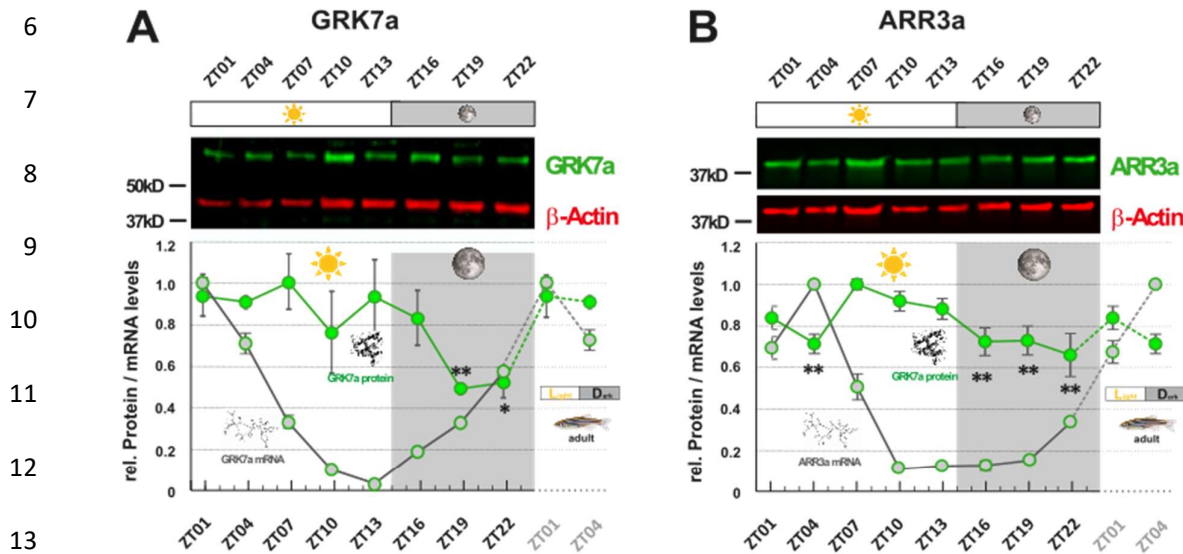

16 **Figure 3. GRK7a and ARR3a protein levels show daily changes in adult zebrafish eyes.**

17 GRK7a (A) and ARR3a (B) protein levels were quantified using Western blot analysis.  $\beta$ -Actin  
 18 was used as a loading control. While mRNA transcript levels (gray circles / RNA structure)  
 19 were lowest in the evening (ZT10 and ZT13, respectively), lowest protein expression levels  
 20 (green circles / protein structure) were tailing RNA expression levels by around 6 to 12 hours,  
 21 reaching lowest levels in the middle of the night at around ZT19. The time point of collection  
 22 is indicated along the x-axis with ZT01 being the time point one hour after the light was turned  
 23 on. Dark periods are indicated by the moon symbol and highlighted in gray, whereas the  
 24 periods under regular light conditions are indicated by the sun symbol and shown in white.  
 25 One-way ANOVA was performed by SPSS (IBM, version 26.0).  $p=0.009$  at ZT19 and  $p=0.013$  at  
 26 ZT22 compared with the highest level at ZT7 in (A).  $p= 0.003$  at ZT04,  $p= 0.004$  at ZT16,  $p=$

1 0.005 at ZT19 and  $p=0.001$  at ZT22 compared with the highest level at ZT7 in (B). Data  
2 represents the mean  $\pm$  s.e.m of three independent measurements in (A) and four  
3 independent measurements in (B). \*  $p<0.05$  \*\* $p<0.01$

4

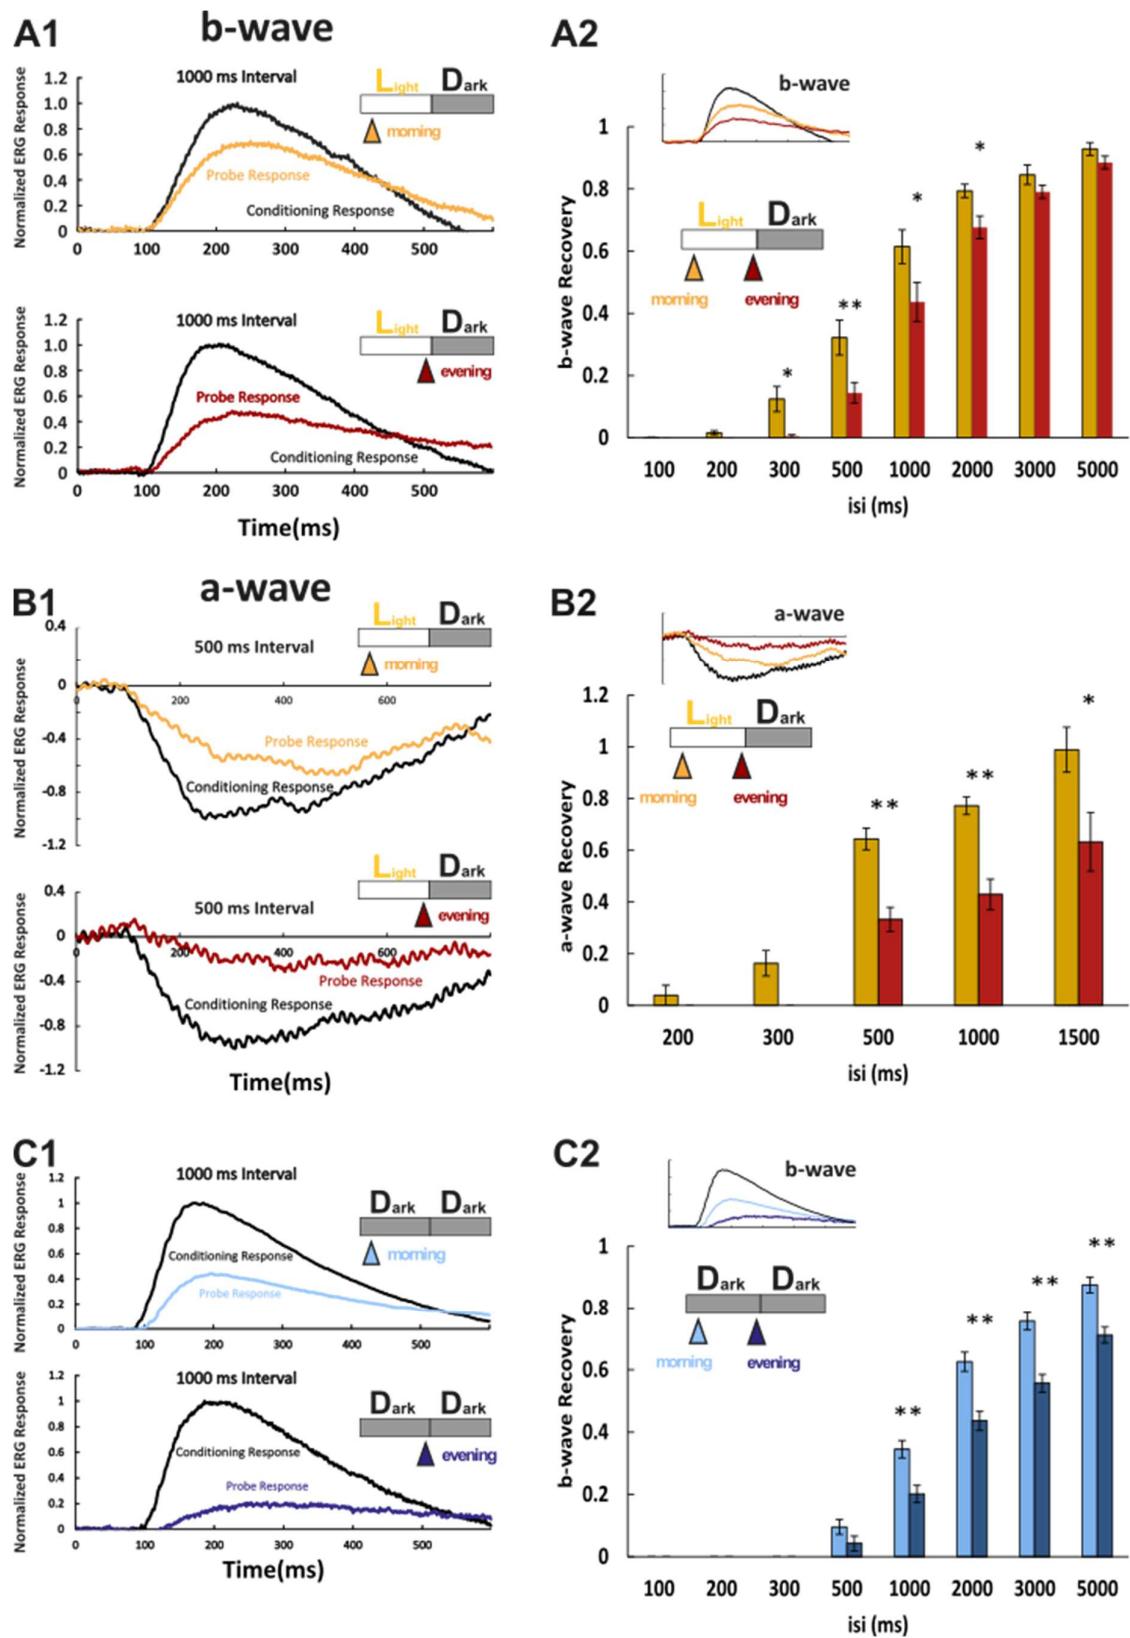

1

2

1 **Figure 4. Larval cone photoresponse recovery is accelerated in the morning.**  
2 **(A1)** Examples of LD larval ERG b-wave recordings. A conditioning flash (black line) was  
3 followed by a probing flash (yellow and red lines) that were separated by 1000 ms. While the  
4 yellow triangle and curve mark the probe response in the morning, the red triangle and curve  
5 represents the probe response recorded in the evening. Note that the probe response in the  
6 evening is clearly diminished. **(A2)** b-wave recovery as a function of the interstimulus interval  
7 (isi). At 500 ms up to 3000 ms isi b-wave recovery in the morning (yellow bars) is significantly  
8 enhanced when compared to corresponding recordings in the evening (red bars). Note that  
9 below 500 ms isi no b-wave recovery can be observed and that at an interval of 5 s complete  
10 recovery can also be found in the evening. Data are presented as mean  $\pm$  s.e.m (n=18 in the  
11 morning; n=14 in the evening) of three independent experiments. Student's t-test was used  
12 to compare the response in the morning and in the evening. p=0.011 at 300 ms isi. p=0.010  
13 at 500 ms isi. p=0.026 at 1000 ms isi. p=0.012 at 2000ms isi. \* p<0.05 \*\*p<0.01 **(B1)** Examples  
14 of LD larval ERG a-wave recordings under DL-TBOA and L-AP4 inhibition. Under b-wave  
15 blocking conditions a conditioning flash (black line) is followed by a probing flash (yellow and  
16 red lines) that were separated by 500 ms. The yellow triangle and curve mark the probe  
17 response in the morning, whereas the red triangle and curve represents the probe response  
18 recorded in the evening. Note that also the a-wave response recovery is significantly reduced  
19 in the evening. **(B2)** a-wave recovery as a function of isi. At 300 ms up to 1500 ms isi a-wave  
20 recovery in the morning (yellow bars) is significantly enhanced when compared to  
21 corresponding recordings in the evening (red bars). Data are presented as mean  $\pm$  s.e.m (n=11  
22 in the morning; n=5 in the evening) of three independent experiments. Student's t-test was  
23 used. p=0.003 at 500 ms isi. p=0.0003 at 1000ms isi. p=0.038 at 1500 ms isi. \* p<0.05 \*\*p<0.01  
24 **(C1)** Examples of ERG b-wave recordings from a larva kept under constant darkness (DD). A  
25 conditioning flash (black line) was followed by a probing flash (light and dark blue lines) that  
26 were separated by 1000 ms. The light blue triangle and curve mark the probe response at the  
27 subjective morning, whereas the dark blue triangle and curve represents the probe response  
28 recorded at the subjective evening. **(C2)** b-wave recovery as a function of the isi is shown for  
29 larvae raised in continuous darkness DD. Even under continuous darkness visual function  
30 remains under circadian control as at 500 ms up to 3000 ms isi, the b-wave recovery in the  
31 subjective morning (light blue bars) is significantly enhanced when compared to  
32 corresponding recordings in the subjective evening (dark blue bars). Data are presented as

1 mean  $\pm$  s.e.m (n=17 in the morning; n=12 in the evening) of three independent experiments.  
2 Student's t-test was used. p=0.0007 at 1000 ms isi. p= 0.002 at 2000 ms isi. p=0.0004 at 3000  
3 ms isi. p=0.0006 at 5000 ms isi. \* p<0.05 \*\*p<0.01  
4  
5  
6 Response recovery was significantly delayed in the evening in comparison to the morning  
7 (Figure 4A2). However, as the ERG b-wave is only an indirect measure for the photoreceptor  
8 response, we also measured the photoreceptor induced a-wave by blocking the masking ERG  
9 b-wave (Figure 4B1). This was achieved by administering a pharmacological cocktail  
10 containing the excitatory amino acid transporter inhibitor DL-threo-beta-benzyloxyaspartate  
11 (DL-TBOA) and metabotropic glutamate receptor inhibitor L-2-amino-4-phosphonobutyric  
12 acid (L-AP4) (Wong *et al*, 2004). Consistently, the double flash paradigm demonstrated that  
13 the a-wave response recovery in the evening was delayed (Figure 4B2).  
14 In order to prove that increased response recovery times measured in the evening are a  
15 bonafide circadian event, we repeated the above experiments on larvae that were kept in  
16 constant darkness. At corresponding time points the decrease in response recovery was  
17 comparable (Figure 4C1&C2), verifying that the observed changes are regulated by an intrinsic  
18 circadian clock.  
19 As photoresponse recovery is affected by the circadian rhythm, we hypothesized that this  
20 should also be apparent in temporal aspects of vision. Therefore, we used flicker ERG  
21 stimulation to determine the flicker fusion frequency at which individual light responses  
22 cannot be separated anymore (Figure 5A). In line with our hypothesis, we found that 9 out of  
23 10 larvae were capable to resolve a flicker frequency of 15 Hz in the morning (Figure 5B),  
24 whereas in the evening only one out of nine larvae could resolve even a lower frequency of  
25 10 hz. This clearly indicates that also the visual temporal resolution is under circadian control.

1

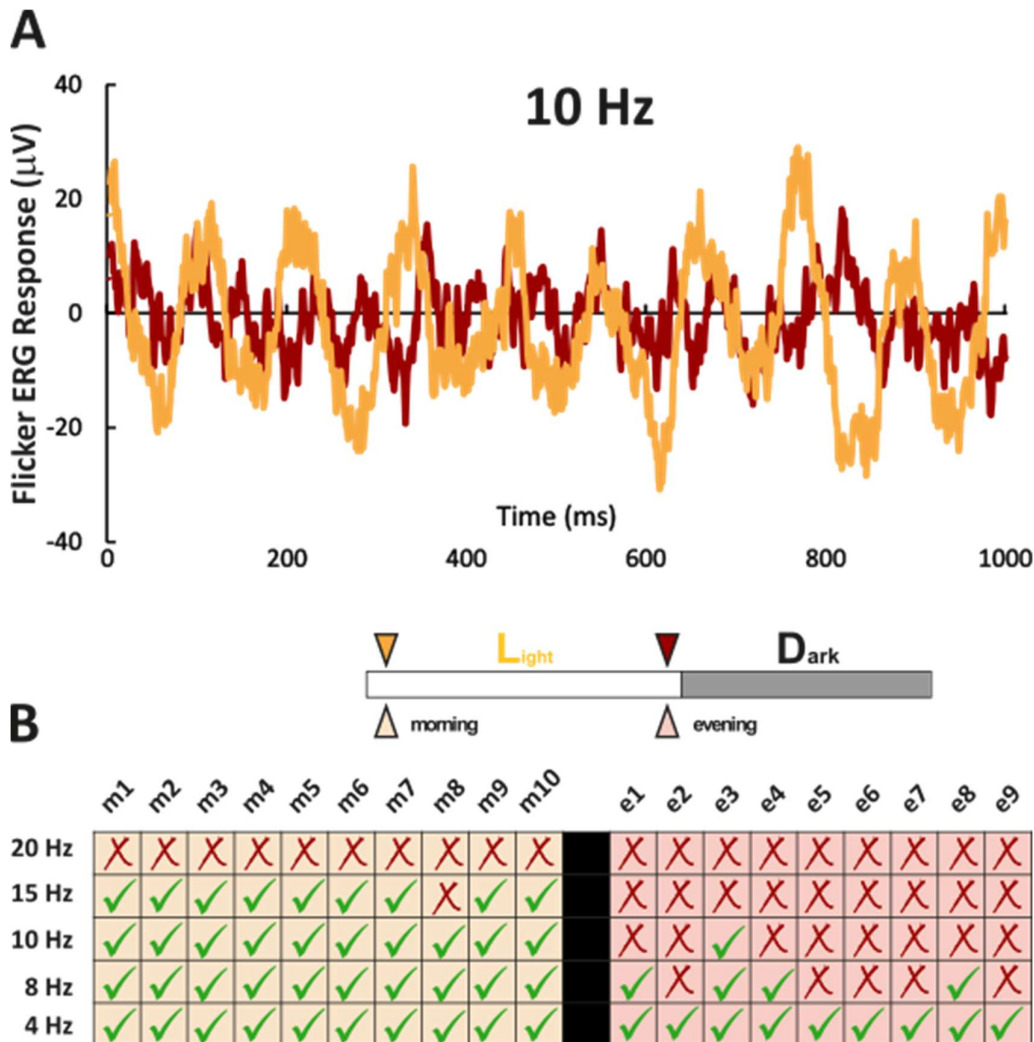

2

3 **Figure 5. Zebrafish larvae show an increased temporal resolution in the morning.**

4 **(A)** Examples of 10 Hz flicker ERG recordings taken in the morning (yellow curve) and in the  
5 evening (red curve). Note that in the morning a temporal resolution of 10 Hz can be clearly  
6 achieved, whereas in the evening a flicker ERG of 10 Hz cannot be resolved. **(B)** Flicker  
7 response resolution table of individual larva. While the left site (light yellow) indicates the  
8 flicker ERG resolution of 10 individual larval zebrafish in the morning, the right part (light red)  
9 displays the flicker ERG resolution in the evening. “Morning” denotes recording time between  
10 ZT1 and ZT2. “Evening” denotes recording time between ZT12.5 and ZT13.5. Note that in the  
11 evening the maximal resolution was in the range of 8 Hz with only one fish being capable of  
12 resolving a 10 Hz frequency, whereas in the morning 9 out of 10 larva were capable to resolve  
13 at least 15 Hz.

1

## 2 **Manipulation of gene expression by light is mirrored by functional changes**

3 Next we measured larvae reared in a reversed light cycle (DL) where the objective night turns  
4 into a subjective day. Under this condition gene expression levels stayed in the fish's  
5 subjective time. ISH for the genes of interest (Figure 6A) reflected this, with a stronger staining  
6 intensity in LD fish in the morning compared to DL fish at the same time in the subjective  
7 evening. Consequently, when both groups were recorded at 120 hours post fertilization, a  
8 prolonged response recovery time was obtained in the fish maintained in reversed light cycle  
9 reflecting the situation in fish kept in the normal light and recorded in the evening (Figure 6D).  
10 While the intrinsic circadian clock is maintained in the absence of light, continuous light  
11 exposure has been shown to disrupt this intrinsic rhythm (Laranjeiro & Whitmore, 2014). We  
12 therefore evaluated if the circadian regulation of mRNA expression persists in larvae kept  
13 under constant light (LL). Strikingly, the gene expression differences between morning and  
14 evening detected under LD conditions were completely lost in LL larvae (Figure 6B&C). This  
15 was also reflected on a functional level with no delay of photoresponse recovery in the  
16 evening as measure by ERG.

17 Taken together these results demonstrate that changes in the light cycle are reflected in  
18 changes of transcript levels of phototransduction regulators that subsequently lead to altered  
19 visual performance at different times during the day.



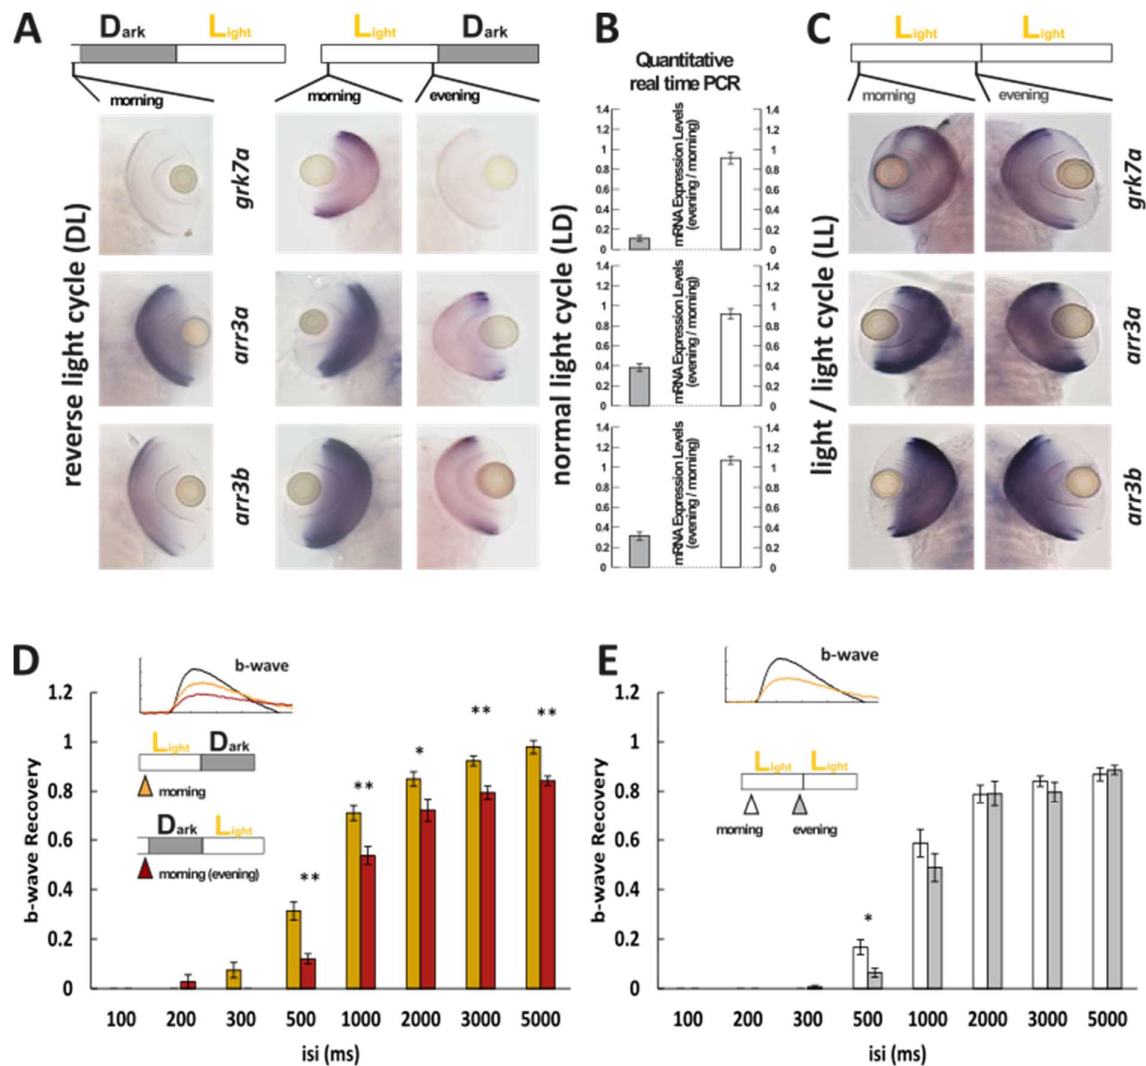

**Figure 6. Light cycle alterations are reflected in adaptations of cone photoresponse recovery.**

(A & C) *In situ* hybridization images using *arr3a*, *arr3b* and *grk7a* as probes. Tissues were collected from either DL (A, left panel), LD (A, right panel) or LL (C) zebrafish larva (5 dpf) at the indicated time points. A reversal in the light cycle from LD to DL is reflected in the reversal of the *in situ* hybridization signal, with low expression levels observed in the subjective evening (A). The ratio of gene expression levels between evening (ZT13) and morning (ZT1) for fish raised under a normal light/dark (LD) cycle or under constant light (LL) are shown in (B). In contrast to the observed circadian regulation under LD conditions, under constant light (LL) conditions expression levels remain continuously elevated not displaying any circadian

1 fluctuation (B, C). **(D)** A reversal of the light cycle is reflected in a corresponding reversal of b-  
2 wave recovery. The comparison of b-wave recovery of LD and DL larvae recorded at the same  
3 time in the morning and the subjective evening clearly indicates that immediately before  
4 darkness b-wave recovery rates are reduced. Data are presented as mean  $\pm$  s.e.m (n=16 in  
5 the morning of the larvae raised in LD; n=9 in subject evening of the larvae raised in DL) of  
6 three independent experiments. Student's t-test was used. p=0.001 at 500 ms. p=0.002 at  
7 1000 ms isi. p=0.022 at 2000 ms isi. p=0.0009 at 3000 ms isi. p=0.002 at 5000 ms isi. \* p<0.05  
8 \*\*p<0.01 **(E)** Under constant light (LL) conditions no changes in b-wave recovery between the  
9 subjective morning and evening can be observed. Data are presented as mean  $\pm$  s.e.m (n=15  
10 in the morning; n=12 in the evening) of three independent experiments. Student's t-test was  
11 used. p=0.011 at 500 ms isi. \* p<0.05 \*\*p<0.01

12

### 13 **Visual motor response (VMR) shows difference between morning and evening**

14 We next asked whether the observed ERG adaptations between morning and evening are  
15 directly influencing visual behavior. Therefore, we measured the visual motor response (VMR).  
16 VMR is the startle response of zebrafish larvae following a drastic change in illumination  
17 (Emran *et al*, 2008). The same individual larvae were measured in the morning (ZT1) and  
18 evening (ZT13). While the baseline activity as well as the normalized startle responses  
19 following light off is generally larger in the morning, the normalized startle responses  
20 following light-on was slightly larger in the evening (Figures 7). This suggests that the alert  
21 reaction triggered by light may be more intense when the general activity is low.

22 In addition to VMR, we also found that the optokinetic response (OKR) showed daily  
23 fluctuations (Figure 7-, figure supplement 1), confirming that circadian controlled expression  
24 changes in visual transduction regulators have indeed an impact on behavioral output.

25

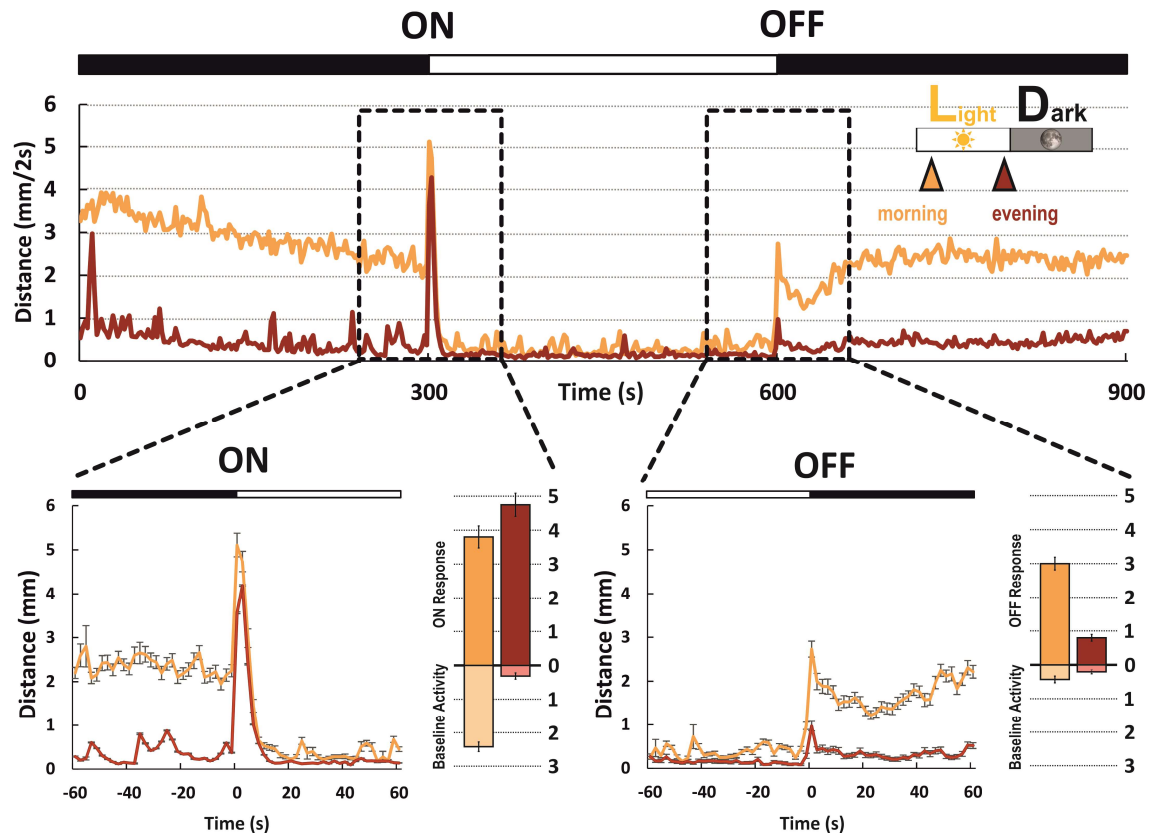

1

2 **Figure 7. Visual behavior shows differences between morning and evening.**

3 Background movement and movement induced to sudden changes in illumination were  
 4 recorded in the morning (yellow curve) and evening (red curve). Data is shown as an average  
 5 of traces for fish recorded in the morning (n=190; yellow curve) and recorded in the evening  
 6 (n=187; red curve) during a 15 minute period. Visual motor response (VMR) around the time  
 7 of illumination changes (black dotted boxes) are enlarged. Baseline activity was quantified as  
 8 the average movement in 60 seconds before the induced light change (light yellow and light  
 9 red bars). Student's t-test was used to compare the response in the morning and in the  
 10 evening. Before the light-on and light off, both the baseline activities are significantly higher  
 11 in the morning than in the evening,  $p < 0.001$ . The amplitude of the VMR to light-on and light-  
 12 off is given by the dark yellow and dark red bars. While the light-on response from fish  
 13 recorded in the morning and evening have a comparable amplitude  $p = 0.02$ , the amplitude of  
 14 the light-off response in fish recorded in the evening is significantly reduced,  $p < 0.001$ .  
 15 "Morning" denotes recording time around ZT1. "Evening" denotes recording time around  
 16 ZT13.

17

## 1 **Discussion**

2 Circadian rhythms have been shown to regulate many biological aspects of vision. An early  
3 study demonstrated that zebrafish visual sensitivity is lower before light on and higher prior  
4 to light off (Li & Dowling, 1998). Later, another study linked the rhythmic expression of long-  
5 wavelength cone opsin to the core clock component CLOCK (Li *et al*, 2008). A particularly  
6 striking finding showed that synaptic ribbons of larval zebrafish photoreceptors disassemble  
7 at night. This peculiar phenomenon may save energy in fast growing larvae (Emran *et al.*,  
8 2010). Our study now demonstrates that regulators of photoresponse decay are not only  
9 influenced by the circadian clock but in addition have a clear effect on the varying visual  
10 performances throughout a 24 hour cycle. Moreover, kinetics of cone visual transduction  
11 quenching is under the control of the circadian clock, which allows the fish to see with better  
12 temporal resolution in the morning than in the evening.

13 It is commonly assumed that circadian gene regulation helps the organism to optimally adapt  
14 to its preferential lifestyle and/or environment. Therefore one would expect that the  
15 circadian systems of diurnal and nocturnal animals adapt differently. Our study indeed  
16 demonstrates that orthologous zebrafish and mouse genes involved in regulating cone visual  
17 transduction decay display an anti-phasic circadian expression pattern, supporting the  
18 functional relevance of the oscillating gene expression. While the visual temporal resolution  
19 of diurnal species is reduced in the evening, the visual system of nocturnal species is tuned to  
20 be most effective during these hours. Zebrafish therefore is an interesting model to study the  
21 physiology of circadian rhythms of diurnal animals, such as humans.

22

23 We would like to point out several additional interesting observations. Although many  
24 ohnologs (paralogs generated in a whole genome duplication event) such as *grk7a* and *grk7b*

1 share a similar circadian phase or oscillatory amplitude, others such as *rcv1a* and *rcv1b* show  
2 an almost anti-phasic relationship. This is remarkable, since these ohnologs have been  
3 generated by a teleost specific whole genome duplication event (Glasauer & Neuhaus, 2014),  
4 implying that initially all ohnologs should have been in synchronicity. Interestingly, these  
5 ohnologs also adapted different expression profiles, with *rcv1a* being expressed in rods and  
6 UV cones, while *rcv1b* is expressed in all cone types in the adult retina (UV, blue, red and  
7 green) (Zang *et al.*, 2015).

8 While the circadian rhythmicity of most genes persists throughout all developmental stages,  
9 some genes do show markedly different expression profiles between larval and adult stages.  
10 This may be related to the fact that the larval retina is functionally cone dominant, while the  
11 adult retina is a duplex retina with rod and cone contribution. In the case of *rcv2* ohnologs,  
12 *rcv2b* displays an in-phase cyclic expression pattern throughout all stages. Conversely, *rcv2a*  
13 did not show an overt cyclic expression pattern at larval stages, but being clearly under  
14 circadian control at adult stages (Figure 1). In contrast to the *rcv1* ohnologs, both *rcv2* genes  
15 are expressed in all cone subtypes and depletion of either one acts to speed up the  
16 photoresponse termination (Zang *et al.*, 2015). Other examples of ohnolog specific cycling  
17 have been found for *arrs* and *rgs* genes (Figure 1, Figure 1-figure supplement 4). These  
18 observations strongly indicate that the transcription of clock controlled genes (CCGs) is not  
19 uniformly regulated.

20 This seems hardly surprising, as around 17% of all genes expressed in zebrafish are circadian  
21 oscillating (Li *et al.*, 2013). Nevertheless, only a limited number of transcription factors and  
22 corresponding binding sites which regulate the core circadian machinery have been identified  
23 so far. Although we identified some conserved binding sites of core clock proteins in our  
24 analyzed genes, neither of them was conserved in mammalian genomes (Supplementary

1 Information & Figure 2-figure supplement 1), suggesting that the regulatory pattern of  
2 circadian regulation is more complex.

3 Interestingly, it has been previously demonstrated that the circadian clock seems to be  
4 desynchronized in larvae raised in darkness (Dekens & Whitmore, 2008; Kaneko & Cahill, 2005;  
5 Kazimi & Cahill, 1999; Lahiri *et al*, 2014). The circadian expression of some core clock genes  
6 and melatonin rhythms are lost when whole larvae were used as the experimental material  
7 in the absence of environmental entrainments. We did not observe this phenomenon in our  
8 study of visual transduction genes in the retina, suggesting the existence of an inheritable  
9 maternal clock in the eye (Delaunay *et al*, 2000). All the analyzed genes in our study are also  
10 expressed in the photoreceptors of the pineal gland, but the transcript fluctuations may not  
11 necessarily be synchronized between eye and pineal gland (Figure 1-figure supplement 1).

12 Among the studied genes in zebrafish, *grk7a* expression level increased by around 50 times  
13 in one day (Figure 1A), whereas Grk7a protein only raised by about 2 times in a 24-hour-period  
14 (Figure 3A). *arr3a* transcript increased about 10 times (Figure 1C), while its protein level only  
15 grew less than 50% throughout the day (Figure 3A). Therefore these mRNA expression levels  
16 reflect proportionally to protein levels, indicative of a rather fast turnover rate for these  
17 proteins.

18 Our OKR experiments revealed that in the evening eye velocity was reduced when compared  
19 to measurements at noon. However, between morning and evening identical results were  
20 obtained, despite slower photoresponse recovery in the evening (Figure 5-figure supplement  
21 1). This was also true for larvae raised in a reversed light cycle and measured at an identical  
22 stage, indicating that maturation cannot be the cause of the observed results. Another  
23 explanation is that visual transduction quenching rate may peak at another time rather than  
24 the time of our recordings. Since the OKR is a very robust response, the difference in the visual

1 transduction may be too subtle to produce a visible change in OKR between morning and  
2 evening.

3 In conclusion, we have shown that key regulators of cone visual transduction at both mRNA  
4 and protein level are under circadian control. Moreover, expression levels of these regulators  
5 in diurnal and nocturnal species are anti-phasic, suggesting that circadian changes influencing  
6 physiological and behavioral properties of vision are reflected in adaptation to different visual  
7 ecologies.

8

## 9 **Materials and Methods**

### 10 **Zebrafish care**

11 Usually zebrafish (*Danio rerio*) were maintained at a standard 14 h light: 10 h dark cycle (LD)  
12 with light on at 8 am and light off at 10 pm. DL (light on at 8 pm and light off at 10 am), DD  
13 (constant darkness; starting at 2 hpf) and LL (constant light) fish were raised in separate  
14 incubators. Water temperatures were always kept between 26 and 28 °C (Amores *et al*, 1998).  
15 Only fish from the WIK wildtype strain were used in our study. Embryos were raised in E3  
16 medium (5 mM NaCl, 0.17 mM KCl, 0.33 mM CaCl<sub>2</sub>, and 0.33 mM MgSO<sub>4</sub>) containing either  
17 0.01% methylene blue to suppress fungal growth and/or 0.2 mM PTU (1-phenyl-2-thiourea;  
18 Sigma-Aldrich) to prevent pigment development. Adult zebrafish were sacrificed using ice  
19 water following decapitation. All animal experiments were carried out in the line with the  
20 ARVO Statement for the Use of Animals in Ophthalmic and Vision Research and were  
21 approved by the Veterinary Authorities of Kanton Zurich, Switzerland (TV4206).

22

### 23 **Zebrafish Quantitative Real-Time PCR (qRT PCR)**

1 Around 30 5 dpf larvae or 5 eyeballs from adult zebrafish were collected per time point (ZT 1,  
2 4,7,10,13,16,19 and 22) and the tissue stored in RNAlater (Sigma) at 4°C. Dark adapted tissue  
3 was collected under dim red light. Only eyeballs were used for RNA extraction using the  
4 NucleoSpin® RNA kit (Macherey-Nagel). cDNA was produced using 110 ng total RNA as  
5 template for reverse transcription with SuperScript® III (Invitrogen, Life Technologies, Zug,  
6 Switzerland). qRT-PCR (Applied Biosystems Prism SDS 7900HT; Life Technologies) was  
7 performed using the MESA Green qPCR Mastermix Plus for SYBR Assay (Eurogentec, Seraing,  
8 Belgium) on a liquid handling robot platform (Tecan Genesis). Primers (Sigma-Aldrich) for qRT-  
9 PCR were intron-spanning to avoid amplification of non-digested genomic DNA fragments and  
10 were designed by online Universal ProbeLibrary Assay Design Center (Roche). Standard  
11 housekeeping genes (elongation factor 1, *ef1*;  $\beta$ -actin2, *actb2*; and ribosomal protein L 13,  
12 *rpl13*) were used as reference (Tang *et al*, 2007). Expression levels were normalized to 1.

13

14 **Table 1: Sequences of primers used for q-RT PCR**

15 *rcv1a* s TGAGAACACGCCAGAAAAGC as CATTTCAGGGTGTTCATGGAGAAC

16 *rcv2a* s CTTGGTCCTCTTTGGAATCAG as AGTGGGCCTTCTCACTCTTC

17 *rcv2b* s TGATGTGGACAAGAACGGTTAC as GGGAAGACTTGTCTGCTTGTC

18 *arr3a* s GCCATCCCTTCACTTTCAATA as GCTTTTCCTTGTCTGCTGG

19 *arr3b* s ACTCCCCCTTGTCTGATGTC as TTGCTCCTCACTGGCTGTAG

20 *grk7a* s TGAACGTCTTGGCTGCAA as CCCAGGGTGGATCGATTAG

21 *grk7b* s ACATTGAGGACCGCCTTG as CCCATGGAGGTGGAATGA

22 *rgs9a* s CAACATTATAGGCCACGGATGAC as GATCCCTTCACACCAGTTGATG

23 *ef1* s CTGGAGGCCAGCTCAAACAT as ATCAAGAAGAGTAGTACCGCTAGCATTAC (Lin *et al*, 2009)

24 *actb2* s CCAGCTGTCTCCCATCCA as TCACCACGTAGCTGTCTTTCTG (Lin *et al.*, 2009)



1 *rpl13* s TCTGGAGGACTGTAAGAGGTATGC as AGACGCACAATCTTGAGAGCAG (Lin *et al.*, 2009)

## 2 **Mouse care and gene expression analysis**

3 Mice were maintained at the Laboratory Animal Services Center (LASC) of the University of  
4 Zurich in a 12 h light: 12 h dark cycle with lights on at 7 am. All animal experiments were  
5 performed according to the ARVO Statement for the Use of Animals in Ophthalmic and Vision  
6 Research and the regulations of Veterinary Authorities of Kanton Zurich, Switzerland.  
7 10 to 12-week-old wildtype mice (129S6, Taconic, Ejby, Denmark) were used in our  
8 experiments. Dark phase mice were killed under red light and retinas were processed further  
9 under normal light conditions. 3 mice at each time point (ZT 1, 5, 9, 13, 17, 21) were sacrificed  
10 and RNA was extracted (Macherey-Nagel, Oensingen, Switzerland) according to  
11 manufacturer's instruction. cDNA synthesized using oligo-dT was done as previously  
12 described (Storti *et al*, 2019). qRT-PCR was performed by ABI QuantStudio3 machine (Thermo  
13 Fisher Scientific) with the PowerUp Sybr Green master mix (Thermo Fisher Scientific). Primer  
14 pairs used are listed in Table2 for each gene of interest. Beta-actin (*Actb*) was used as a  
15 housekeeping gene to normalize gene expression with the comparative threshold cycle  
16 method (DDCt) using the Relative Quantification software (Thermo Fisher Scientific). The  
17 highest expression level was normalized to 1.

18

### 19 **Table2. Mouse Primer Sequences**

20 *Arr1* s GCTCTGTGCGGTTACTGATCC as TGTCGGTGTGTTGGTCACG

21 *Arr3* s GCTAACCTGCCCTGTTCAGT as GCTAACCTGCCCTGTTCAGT

22 *Grk1* s TGAAGGCGACTGGCAAGATG as AGGTCCGTCTTGGTCTCGAA

23 *Rgs9* s TTCGCTCCCATTTCGTGTTGT as ATGTCCTTACCAGGGCTTC

1 *Rcv1* s AGTGGCCTTCTCGCTCTA as ATCATCTGGGAGGAGTTTCACA

2 *Actb* s CAACGGCTCCGGCATGTGC as CTCTTGCTCTGGGCCTCG

3

#### 4 ***In Situ* Hybridization (ISH)**

5

6 Primers used to generate *in situ* probes are listed in table 3. Probes were digoxigenin-labeled  
7 using the DIG RNA Labeling Mix purchased from Roche.

8 For whole-mount ISH embryos were treated with E3 containing 0.2mMPTU (1-phenyl-2  
9 thiourea; Sigma-Aldrich) to avoid pigmentation. 5 dpf larvae were fixed in 4%  
10 paraformaldehyde (PFA; Sigma) in phosphate-buffered saline (PBS) overnight at 4 °C. Time  
11 points with maximal differences were chosen according to qRT-PCR results. Embryos were  
12 washed 3 times in PBS containing 1% Tween (PBT), dehydrated step-wise (25%, 50%, 70%  
13 MeOH in PBT) and stored in 100% MeOH at -20 °C.

14 For slide ISH, eyeballs were removed from adult zebrafish at different time points. And fixed  
15 overnight at 4 °C using 4% PFA. Detailed ISH processes have been previously described (Haug  
16 *et al*, 2015).

17

#### 18 **Table3. Primer sequences for *in situ* probe preparation**

19 *rcv1a* s GGACCAGAGTACAATTTAAG as GAAGCTCTAATCAGTCATAG (Zang *et al.*, 2015)

20 *rcv1b* s CAGACCAGCACACATAC as TCTTGCACTTTCTGTGGTT (Zang *et al.*, 2015)

21 *rcv2a* s CAACATCTTTCTGAGCCC as ATAGCGTCTTCATTCTCC (Zang *et al.*, 2015)

22 *rcv2b* s CACTCAGACAGAAGTCAT as GTAGACCATCATCGCTTG (Zang *et al.*, 2015)

23 *grk7a* s GCATCTTCTAGTCTGATAGCAC as ACAGCTTCAATCATGTTAGTGA (Rinner *et al.*, 2005)

24 *grk7b* s CCCAGAGCGTCATATAGTG as AGTCACAGGAATAAGCTATGAA (Rinner *et al.*, 2005)

25 *rgs9a* s TTCCGGAATACAAAATGACAA as GCCTCGTGGGTCATTGAG

1 *rgs9b* s GAAGCGAATATGACCATAAGG as ATCAGCCCTTCCTCGTTG

2 *arr3a* s ATGGCTGACAAAGTTTACAAG as GCCCTGTGGAATCTGATATG (Renninger *et al.*, 2011)

3 *arr3b* s CATGACAAAGGTTTACAAGAAG as TGCTCCTCACTGGCTGTAG (Renninger *et al.*, 2011)

4 *arrSa* s CAATGAGTCCAAAAATGTCTG as TAACCGAGAAGTGCTCTTTC (Renninger *et al.*, 2011)

5 *arrSb* s ATGAGTCCCAAGCACATCATC as CAGCCAGCTCAAAACACG (Renninger *et al.*, 2011)

6

## 7 **Infrared Western Blotting**

8 5 eyeballs from adult zebrafish were homogenized in ice-cold 150 ml RIPA buffer (150  
9 mMNaCl, 1%Triton-X, 0.5% sodiumdeoxycholate, 50 mM Tris (pH 8), 1 mM EDTA, 0.1% SDS)  
10 containing cOmplete™ Protease Inhibitor Cocktail (Roche). After 2 h incubation on a 4°C  
11 shaker, lysates were centrifuged for 30 min at 4°C. Supernatants were stored at -80°C.  
12 Nitrocellulose membranes with 0.45 μm pore size were used. Primary antibodies were  
13 diluted to the following concentrations: rabbit anti-Arr3a: 1 : 4,000; rabbit anti-Grk7a: 1 : 3000;  
14 mouse anti-β-Actin: 1 : 6000 (Renninger *et al.*, 2011; Rinner *et al.*, 2005). Anti-arr3a and anti-  
15 β-Actin antibody or anti-Grk7a and anti- β-Actin antibody were applied simultaneously.  
16 Secondary antibody IRDye® 800CW Goat anti-Rabbit IgG and IRDye® 680RD Goat anti-Mouse  
17 IgG (LI-COR) were diluted 1:20,000 in blocking buffer (1% BSA in PBST). Signal was detected  
18 by the Odyssey® CLx Imaging System (LI-COR) and the data was normalized to the internal  
19 loading control β-Actin by IMAGEJ (Schindelin *et al.*, 2012).

20

## 21 **Electroretinography (ERG)**

22 ERG was recorded as previously described (Zang *et al.*, 2015). Light intensity (light source:  
23 Zeiss XBO 75 W) was measured using a spectrometer (Ocean Optics, USB2000b; software  
24 Spectra Suite, Ocean Optics) with a spectral range describe previously (Zang *et al.*, 2015). Pairs

1 of two light flashes with equal intensity and duration (500 ms) were applied (Rinner *et al.*,  
2 2005). Intervals between two flashes were either 100, 200, 300, 500, 1000, 2000, 3000 or  
3 5000 ms. The interval between two pairs was 20 s. b-wave recovery is defined as the ratio of  
4 the second b-wave amplitude to the first one in the same pair.

5 To measure ERG a-wave, 5 dpf larval eyeballs were treated with 400  $\mu$ M APB and 200  $\mu$ M  
6 TBOA in Ringer's solution (111 mM NaCl, 2.5 mM KCl, 1 mM CaCl<sub>2</sub>, 1.6 mM MgCl<sub>2</sub>, 10  $\mu$ M  
7 EDTA as chelator for heavy metal ions, 10 mM glucose, and 3 mM HEPES buffer, adjusted to  
8 pH 7.7–7.8 with NaOH). A HPX-2000 (Ocean Optics) light source was used. Intervals between  
9 two flashes were 300 ms, 500 ms, 1000ms and 1500 ms respectively. a-wave recovery is  
10 defined as the ratio of the second a-wave amplitude to the first one in the same pair.

11 Flicker fusion ERGs were measured with a white light LED bulb that was connected to a pulse  
12 generator (Grass). Each pulse lasted for 15 ms and the flicker frequencies of 4 Hz, 5 Hz, 8 Hz,  
13 10Hz, 15 Hz and 20 Hz were used. Each flicking light stimuli was presented for 5 s.

#### 14 **Visual motor response (VMR)**

15 The visual motor response (VMR) was measured using a Zebrabox (ViewPoint Life Science,  
16 Lyon, France). 5 dpf larvae were placed in a 96-well plate, dark adaptation for 10 minutes  
17 inside the Zebrabox and larval movement recorded with light off, on and off for 5 minutes  
18 each. The distance which a single larva moved was measured every 2 seconds. Baseline  
19 activity was calculated as the average of movement 1 minute before light on or off.

#### 20 **Optokinetic response (OKR)**

21 The OKR was recorded as previously described (Rinner *et al.*, 2005). Briefly, 5 dpf larvae were  
22 tested with sinusoidal gratings at different time points (ZT 1, 4, 7, 10 and 13). To determine  
23 the contrast sensitivity a spatial frequency of 20 cycles/360° and an angular velocity of 7.5  
24 deg/s were used with different contrast settings (5%, 10%, 20%, 40%, 70% and 100%). To

1 explore the spatial sensitivity, an angular velocity of 7.5/s and 70% of maximum contrast were  
2 applied with varying spatial frequency (7, 14, 21, 28, 42, and 56 cycles/360°). Figures were  
3 prepared by SPSS (Version 23.0. Armonk, NY: IBM Corp).

4

## 5 **References**

- 6 Allison WT, Barthel LK, Skebo KM, Takechi M, Kawamura S, Raymond PA (2010) Ontogeny of cone  
7 photoreceptor mosaics in zebrafish. *J Comp Neurol* 518: 4182-4195
- 8 Amores A, Force A, Yan YL, Joly L, Amemiya C, Fritz A, Ho RK, Langeland J, Prince V, Wang YL *et al*  
9 (1998) Zebrafish hox clusters and vertebrate genome evolution. *Science* 282: 1711-1714
- 10 Brown AJ, Pendergast JS, Yamazaki S (2019) Peripheral Circadian Oscillators. *Yale J Biol Med* 92: 327-  
11 335
- 12 Burns ME, Baylor DA (2001) Activation, deactivation, and adaptation in vertebrate photoreceptor  
13 cells. *Annu Rev Neurosci* 24: 779-805
- 14 Cahill GM (2002) Clock mechanisms in zebrafish. *Cell Tissue Res* 309: 27-34
- 15 Chen CK, Burns ME, Spencer M, Niemi GA, Chen J, Hurley JB, Baylor DA, Simon MI (1999) Abnormal  
16 photoresponses and light-induced apoptosis in rods lacking rhodopsin kinase. *Proc Natl Acad Sci U S*  
17 *A* 96: 3718-3722
- 18 Chen CK, Woodruff ML, Chen FS, Chen Y, Cilluffo MC, Tranchina D, Fain GL (2012) Modulation of  
19 mouse rod response decay by rhodopsin kinase and recoverin. *J Neurosci* 32: 15998-16006
- 20 Cunningham LL, Gonzalez-Fernandez F (2000) Coordination between production and turnover of  
21 interphotoreceptor retinoid-binding protein in zebrafish. *Invest Ophthalmol Vis Sci* 41: 3590-3599
- 22 Dekens MP, Whitmore D (2008) Autonomous onset of the circadian clock in the zebrafish embryo.  
23 *EMBO J* 27: 2757-2765
- 24 Delaunay F, Thisse C, Marchand O, Laudet V, Thisse B (2000) An inherited functional circadian clock  
25 in zebrafish embryos. *Science* 289: 297-300
- 26 Emran F, Rihel J, Adolph AR, Dowling JE (2010) Zebrafish larvae lose vision at night. *Proc Natl Acad*  
27 *Sci U S A* 107: 6034-6039
- 28 Emran F, Rihel J, Dowling JE (2008) A behavioral assay to measure responsiveness of zebrafish to  
29 changes in light intensities. *J Vis Exp*
- 30 Fadool JM (2003) Development of a rod photoreceptor mosaic revealed in transgenic zebrafish. *Dev*  
31 *Biol* 258: 277-290
- 32 Fain GL, Matthews HR, Cornwall MC, Koutalos Y (2001) Adaptation in vertebrate photoreceptors.  
33 *Physiol Rev* 81: 117-151
- 34 Frøland Steindal IA, Whitmore D (2019) Circadian Clocks in Fish-What Have We Learned so far?  
35 *Biology (Basel)* 8
- 36 Fu Y, Yau KW (2007) Phototransduction in mouse rods and cones. *Pflugers Arch* 454: 805-819
- 37 Glasauer SM, Neuhauss SC (2014) Whole-genome duplication in teleost fishes and its evolutionary  
38 consequences. *Mol Genet Genomics* 289: 1045-1060
- 39 Golombek DA, Bussi IL, Agostino PV (2014) Minutes, days and years: molecular interactions among  
40 different scales of biological timing. *Philos Trans R Soc Lond B Biol Sci* 369: 20120465
- 41 Haug MF, Gesemann M, Lazović V, Neuhauss SC (2015) Eumetazoan cryptochrome phylogeny and  
42 evolution. *Genome Biol Evol* 7: 601-619
- 43 Idda ML, Bertolucci C, Vallone D, Gothilf Y, Sánchez-Vázquez FJ, Foulkes NS (2012) Circadian clocks:  
44 lessons from fish. *Prog Brain Res* 199: 41-57

- 1 Jin NG, Chuang AZ, Masson PJ, Ribelayga CP (2015) Rod electrical coupling is controlled by a
- 2 circadian clock and dopamine in mouse retina. *J Physiol* 593: 1597-1631
- 3 Kaneko M, Cahill GM (2005) Light-dependent development of circadian gene expression in
- 4 transgenic zebrafish. *PLoS Biol* 3: e34
- 5 Kazimi N, Cahill GM (1999) Development of a circadian melatonin rhythm in embryonic zebrafish.
- 6 *Brain Res Dev Brain Res* 117: 47-52
- 7 Ko GY (2020) Circadian regulation in the retina: From molecules to network. *Eur J Neurosci* 51: 194-
- 8 216
- 9 Krispel CM, Chen D, Melling N, Chen YJ, Martemyanov KA, Quillinan N, Arshavsky VY, Wensel TG,
- 10 Chen CK, Burns ME (2006) RGS expression rate-limits recovery of rod photoresponses. *Neuron* 51:
- 11 409-416
- 12 Lahiri K, Froehlich N, Heyd A, Foulkes NS, Vallone D (2014) Developmental stage-specific regulation
- 13 of the circadian clock by temperature in zebrafish. *Biomed Res Int* 2014: 930308
- 14 Lamb TD, Pugh EN (2006) Phototransduction, dark adaptation, and rhodopsin regeneration the
- 15 proctor lecture. *Invest Ophthalmol Vis Sci* 47: 5137-5152
- 16 Laranjeiro R, Whitmore D (2014) Transcription factors involved in retinogenesis are co-opted by the
- 17 circadian clock following photoreceptor differentiation. *Development* 141: 2644-2656
- 18 Li H, Chuang AZ, O'Brien J (2009) Photoreceptor coupling is controlled by connexin 35
- 19 phosphorylation in zebrafish retina. *J Neurosci* 29: 15178-15186
- 20 Li L, Dowling JE (1998) Zebrafish visual sensitivity is regulated by a circadian clock. *Vis Neurosci* 15:
- 21 851-857
- 22 Li P, Chaurasia SS, Gao Y, Carr AL, Iuvone PM, Li L (2008) CLOCK is required for maintaining the
- 23 circadian rhythms of Opsin mRNA expression in photoreceptor cells. *J Biol Chem* 283: 31673-31678
- 24 Li Y, Li G, Wang H, Du J, Yan J (2013) Analysis of a gene regulatory cascade mediating circadian
- 25 rhythm in zebrafish. *PLoS Comput Biol* 9: e1002940
- 26 Lin C, Spikings E, Zhang T, Rawson D (2009) Housekeeping genes for cryopreservation studies on
- 27 zebrafish embryos and blastomeres. *Theriogenology* 71: 1147-1155
- 28 Matthews HR, Sampath AP (2010) Photopigment quenching is Ca<sup>2+</sup> dependent and controls
- 29 response duration in salamander L-cone photoreceptors. *J Gen Physiol* 135: 355-366
- 30 Menger GJ, Koke JR, Cahill GM (2005) Diurnal and circadian retinomotor movements in zebrafish. *Vis*
- 31 *Neurosci* 22: 203-209
- 32 Renninger SL, Gesemann M, Neuhauss SC (2011) Cone arrestin confers cone vision of high temporal
- 33 resolution in zebrafish larvae. *Eur J Neurosci* 33: 658-667
- 34 Ribelayga C, Cao Y, Mangel SC (2008) The circadian clock in the retina controls rod-cone coupling.
- 35 *Neuron* 59: 790-801
- 36 Rinner O, Makhankov YV, Biehlmaier O, Neuhauss SC (2005) Knockdown of cone-specific kinase
- 37 GRK7 in larval zebrafish leads to impaired cone response recovery and delayed dark adaptation.
- 38 *Neuron* 47: 231-242
- 39 Samardzija M., Neuhauss S.C.F., Joly S. K-LM, C. G, 2009. Animal Models for Retinal Degeneration.
- 40 Schindelin J, Arganda-Carreras I, Frise E, Kaynig V, Longair M, Pietzsch T, Preibisch S, Rueden C,
- 41 Saalfeld S, Schmid B *et al* (2012) Fiji: an open-source platform for biological-image analysis. *Nat*
- 42 *Methods* 9: 676-682
- 43 Stenkamp DL, Calderwood JL, Van Niel EE, Daniels LM, Gonzalez-Fernandez F (2005) The
- 44 interphotoreceptor retinoid-binding protein (IRBP) of the chicken (*Gallus gallus domesticus*). *Mol Vis*
- 45 11: 833-845
- 46 Storti F, Klee K, Todorova V, Steiner R, Othman A, van der Velde-Visser S, Samardzija M, Meneau I,
- 47 Barben M, Karademir D *et al* (2019) Impaired ABCA1/ABCG1-mediated lipid efflux in the mouse
- 48 retinal pigment epithelium (RPE) leads to retinal degeneration. *Elife* 8
- 49 Tang R, Dodd A, Lai D, McNabb WC, Love DR (2007) Validation of zebrafish (*Danio rerio*) reference
- 50 genes for quantitative real-time RT-PCR normalization. *Acta Biochim Biophys Sin (Shanghai)* 39: 384-
- 51 390

- 1 Ukai H, Ueda HR (2010) Systems biology of mammalian circadian clocks. *Annu Rev Physiol* 72: 579-
- 2 603
- 3 Vatine G, Vallone D, Gothilf Y, Foulkes NS (2011) It's time to swim! Zebrafish and the circadian clock.
- 4 *FEBS Lett* 585: 1485-1494
- 5 Wada Y, Sugiyama J, Okano T, Fukada Y (2006) GRK1 and GRK7: unique cellular distribution and
- 6 widely different activities of opsin phosphorylation in the zebrafish rods and cones. *J Neurochem* 98:
- 7 824-837
- 8 Wong KY, Gray J, Hayward CJ, Adolph AR, Dowling JE (2004) Glutamatergic mechanisms in the outer
- 9 retina of larval zebrafish: analysis of electroretinogram b- and d-waves using a novel preparation.
- 10 *Zebrafish* 1: 121-131
- 11 Xue Y, Shen SQ, Corbo JC, Kefalov VJ (2015) Circadian and light-driven regulation of rod dark
- 12 adaptation. *Sci Rep* 5: 17616
- 13 Zang J, Keim J, Kastenhuber E, Gesemann M, Neuhauss SC (2015) Recoverin depletion accelerates
- 14 cone photoresponse recovery. *Open Biol* 5
- 15 Zang J, Matthews HR (2012) Origin and control of the dominant time constant of salamander cone
- 16 photoreceptors. *J Gen Physiol* 140: 219-233
- 17 Zang J, Neuhauss SCF (2018) The Binding Properties and Physiological Functions of Recoverin. *Front*
- 18 *Mol Neurosci* 11: 473
- 19 Zimmermann MJY, Nevala NE, Yoshimatsu T, Osorio D, Nilsson DE, Berens P, Baden T (2018)
- 20 Zebrafish Differentially Process Color across Visual Space to Match Natural Scenes. *Curr Biol* 28:
- 21 2018-2032.e2015
- 22 Znoiko SL, Rohrer B, Lu K, Lohr HR, Crouch RK, Ma JX (2005) Downregulation of cone-specific gene
- 23 expression and degeneration of cone photoreceptors in the Rpe65<sup>-/-</sup> mouse at early ages. *Invest*
- 24 *Ophthalmol Vis Sci* 46: 1473-1479

25

Figure 1- figure supplement 1

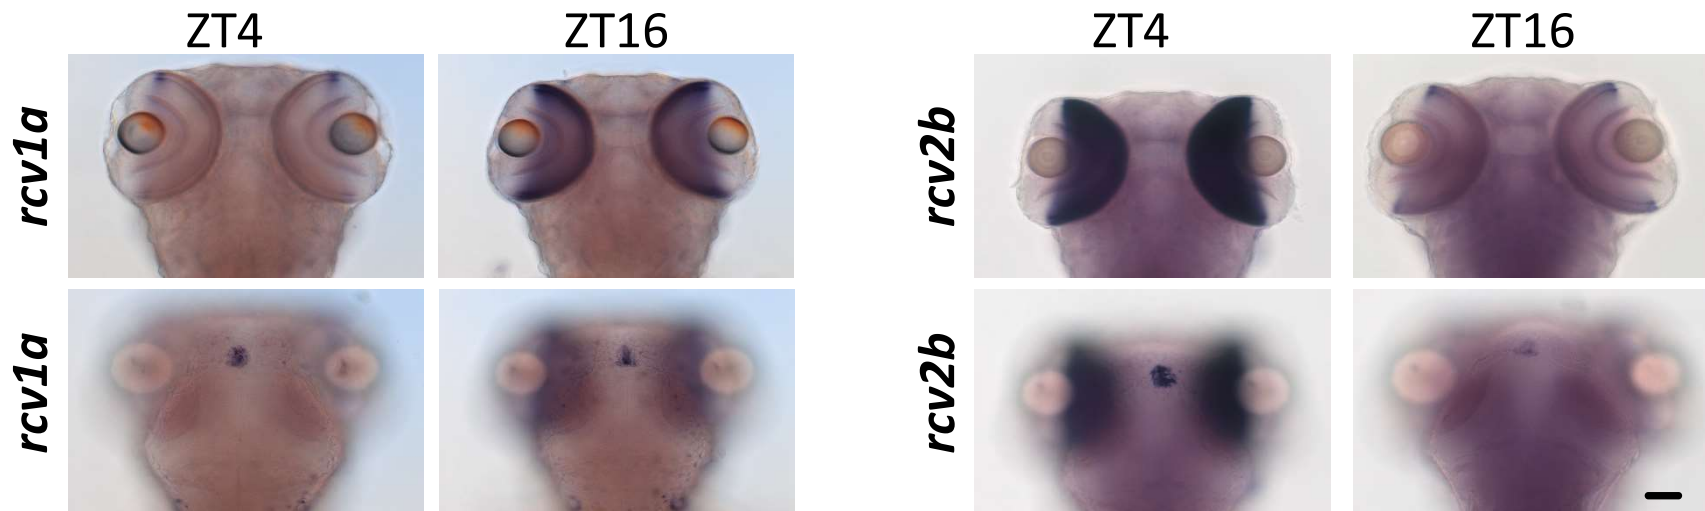

**ISH of *rcv1a* and *rcv2b* as examples indicating the staining in pineal gland may not or may be synchronized with the staining in the eye.**

Scale bar (=50  $\mu$ m) applies to all panels.



Figure 1- figure supplement 2

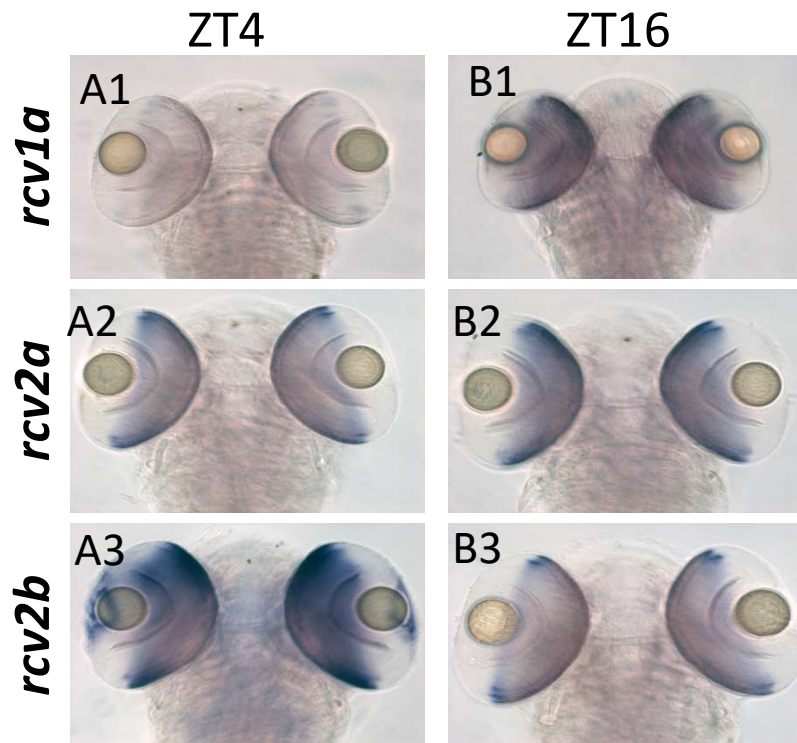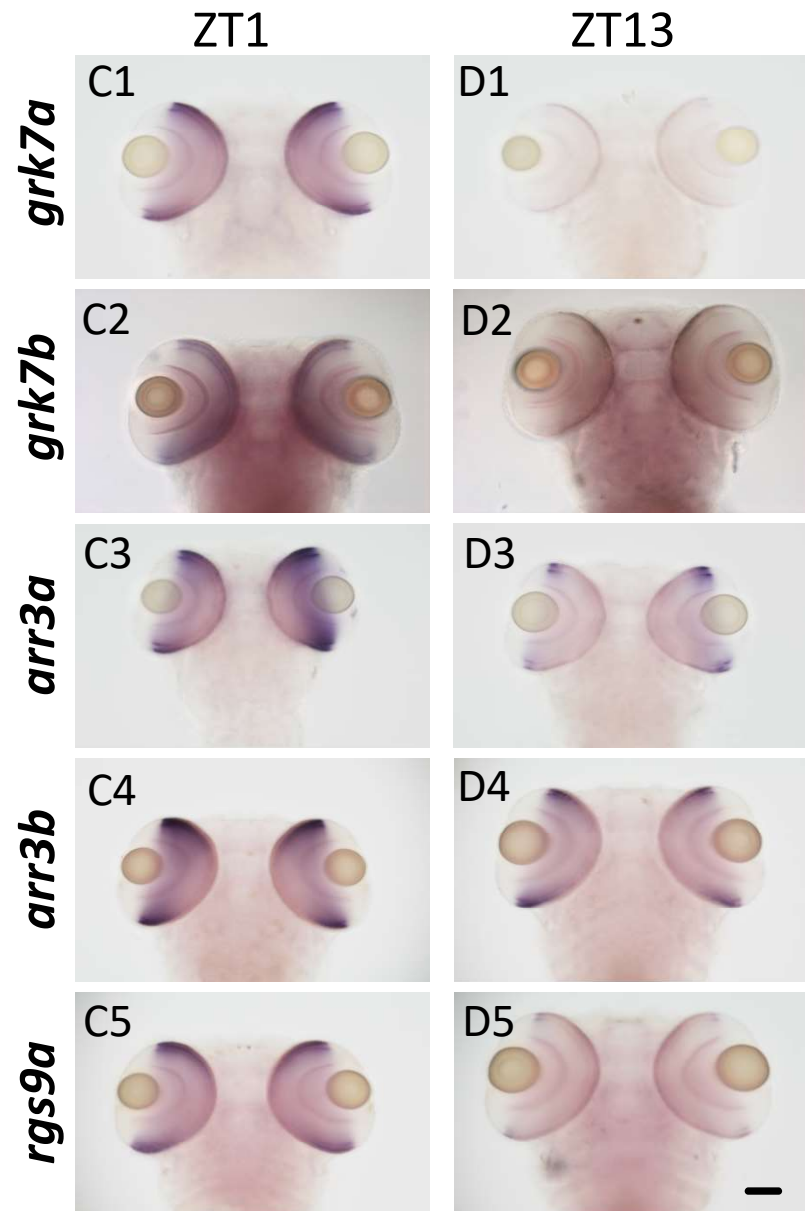

ISH showing different gene expressions at varying time points in 5 dpf zebrafish larvae in dorsal view.

Scale bar (=50  $\mu$ m) applies to all panels.

Figure 1- figure supplement 3

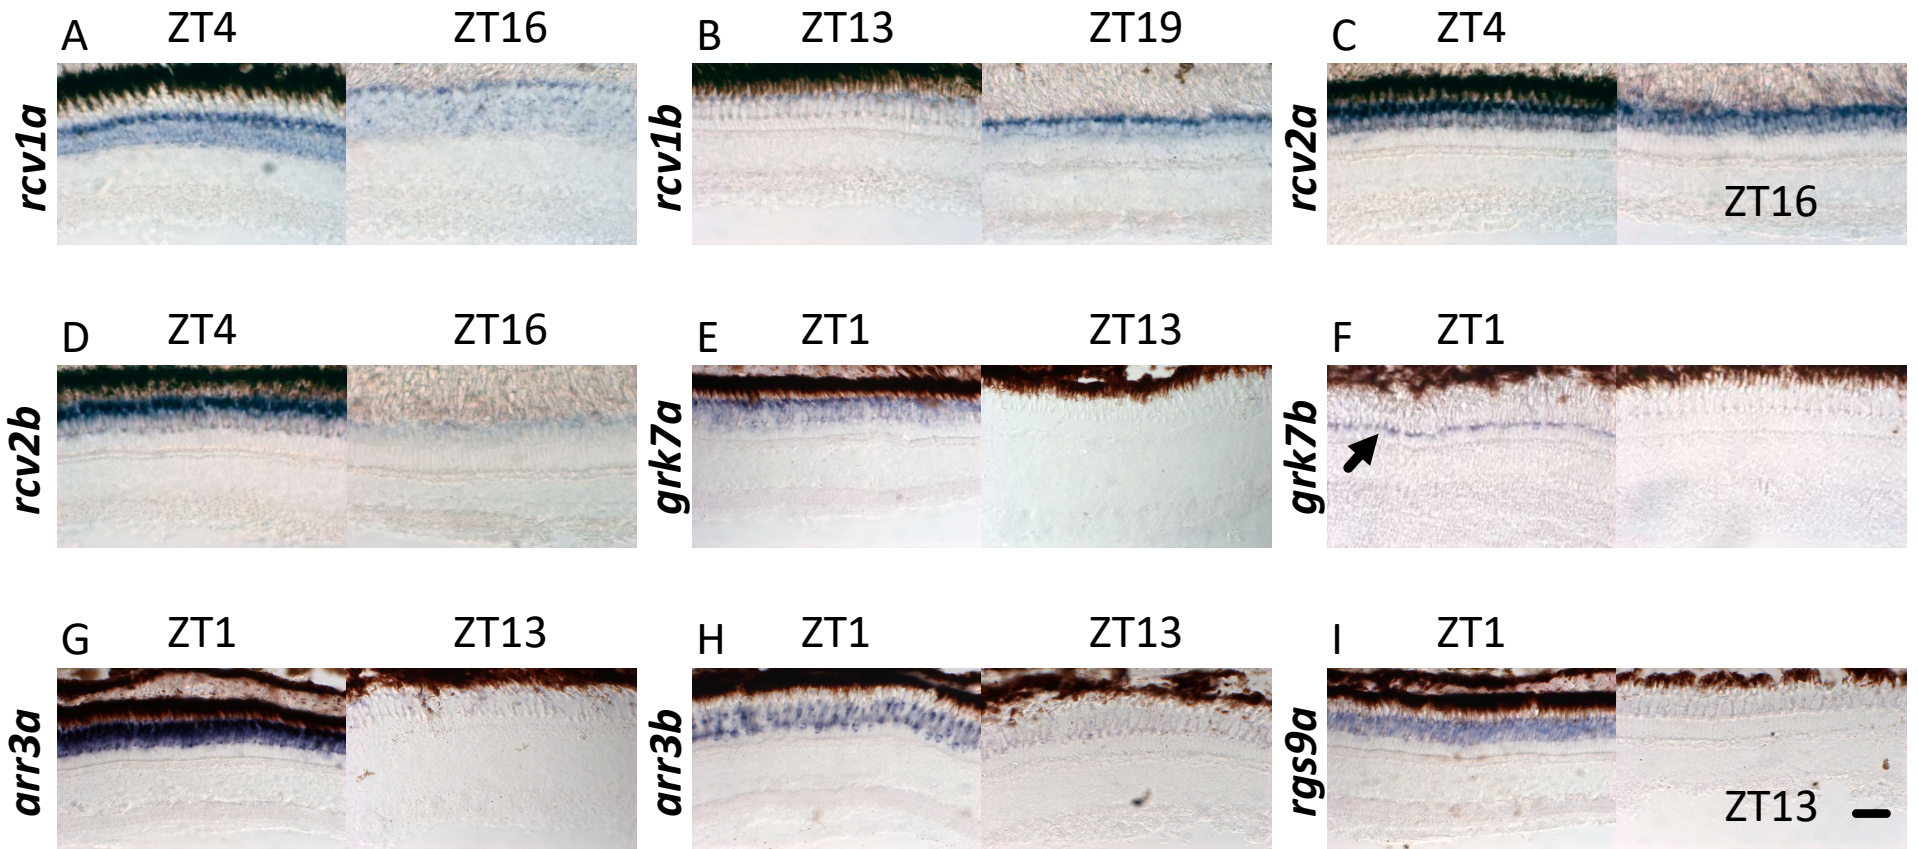

**ISH showing different gene expressions on radial sections of adult zebrafish retina at different time points indicated on top.**

Arrow denotes UV cones. Scale bar (=20  $\mu$ m)

Figure 1- figure supplement 4

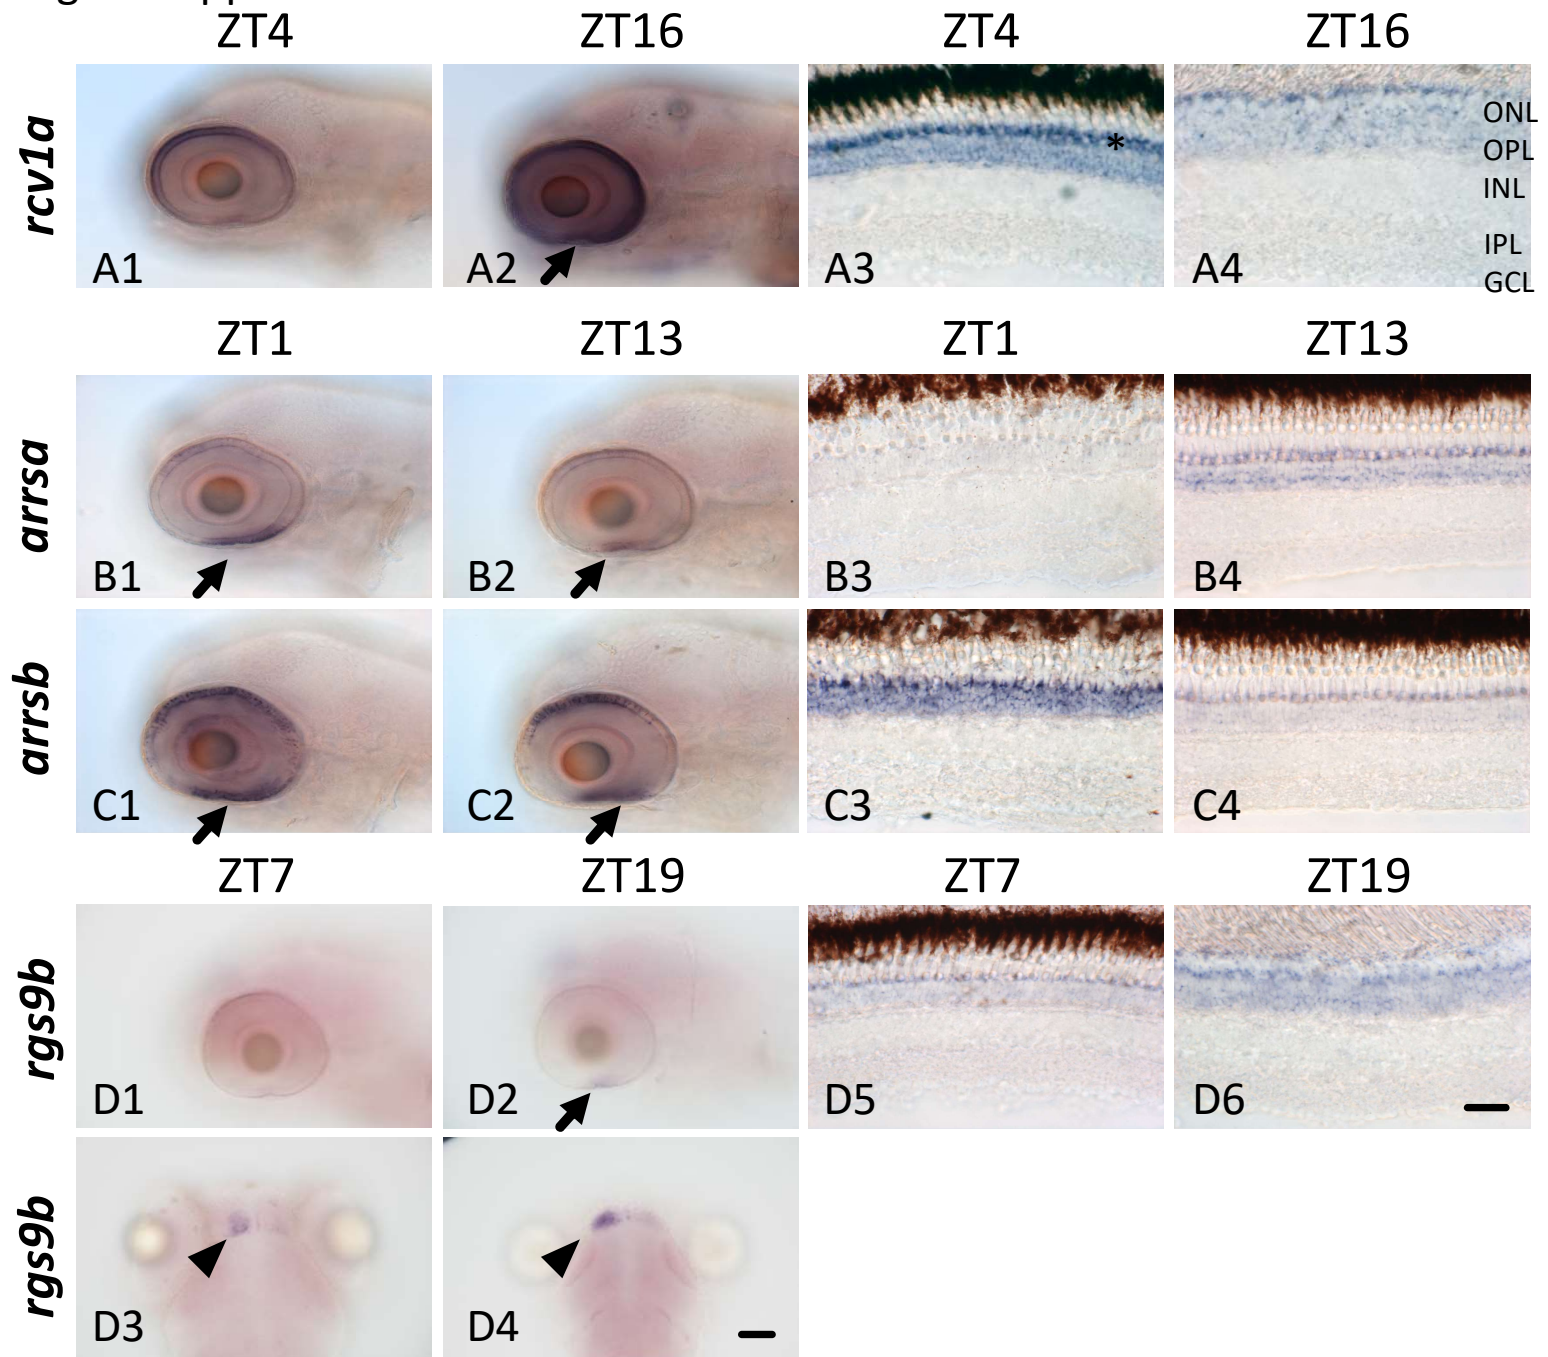

Figure 1- figure supplement 4

**ISH showing different rod gene expressions in zebrafish larvae and adult retina at different time points indicated on top.**

Arrows denote region enriched with rods. Arrowhead denotes habenula. Star denotes UV cone layer. GCL, ganglion cell layer; INL, inner nuclear layer; IPL, inner plexiform layer; ONL, outer nuclear layer; OPL, outer plexiform layer. Scale bar (=20  $\mu\text{m}$ ) applies to corresponding panels.

Figure 2- figure supplement 1  
**Conserved non-canonical E-boxes in mouse genes.**

A

|                   |        |         |        |           |                                                               |                   |          |        |          |        |           |        |            |        |            |
|-------------------|--------|---------|--------|-----------|---------------------------------------------------------------|-------------------|----------|--------|----------|--------|-----------|--------|------------|--------|------------|
| human             | caactg | ---6--- | gacgtg | ---427--- | <table border="1"><tr><td><i>Arr1</i> Exon1</td></tr></table> | <i>Arr1</i> Exon1 | ---30--- | cgcgtg | ---19--- | cacggg | ---420--- | ctcgtg | ---1632--- | cacctg | ---4268--- |
| <i>Arr1</i> Exon1 |        |         |        |           |                                                               |                   |          |        |          |        |           |        |            |        |            |
| rat               | caactg | ---6--- | gacgtg | ---341--- | <table border="1"><tr><td><i>Arr1</i> Exon1</td></tr></table> | <i>Arr1</i> Exon1 | ---31--- | cgcgtg | ---19--- | cacggg | ---402--- | ctcgtg | ---1453--- | cacctg | ---4105--- |
| <i>Arr1</i> Exon1 |        |         |        |           |                                                               |                   |          |        |          |        |           |        |            |        |            |
| mouse             | caactg | ---6--- | gacgtg | ---338--- | <table border="1"><tr><td><i>Arr1</i> Exon1</td></tr></table> | <i>Arr1</i> Exon1 | ---31--- | cgcgtg | ---19--- | cacggg | ---397--- | ctcgtg | ---1447--- | cacctg | ---3877--- |
| <i>Arr1</i> Exon1 |        |         |        |           |                                                               |                   |          |        |          |        |           |        |            |        |            |

|       |        |            |        |            |        |            |        |           |        |            |        |             |        |            |
|-------|--------|------------|--------|------------|--------|------------|--------|-----------|--------|------------|--------|-------------|--------|------------|
| human | cagatg | ---2575--- | catctg | ---1033--- | cacttg | ---6106--- | caggtg | ---272--- | catctg | ---6294--- | catctg | ---22620--- | cagctg | ---4385--- |
| rat   | cagatg | ---2287--- | catctg | ---1036--- | cacttg | ---6279--- | caggtg | ---239--- | catctg | ---5015--- | catctg | ---14707--- | cagctg | ---1709--- |
| mouse | cagatg | ---2713--- | catctg | ---1017--- | cacttg | ---6676--- | caggtg | ---247--- | catctg | ---3792--- | catctg | ---14918--- | cagctg | ---2094--- |

|                   |        |           |        |            |        |            |                                                               |                   |
|-------------------|--------|-----------|--------|------------|--------|------------|---------------------------------------------------------------|-------------------|
| human             | caggtg | ---144--- | cacctg | ---7932--- | cccgtg | ---3734--- | <table border="1"><tr><td><i>Arr1</i> Exon2</td></tr></table> | <i>Arr1</i> Exon2 |
| <i>Arr1</i> Exon2 |        |           |        |            |        |            |                                                               |                   |
| rat               | caggtg | ---116--- | cacctg | ---6697--- | cccgtg | ---2583--- | <table border="1"><tr><td><i>Arr1</i> Exon2</td></tr></table> | <i>Arr1</i> Exon2 |
| <i>Arr1</i> Exon2 |        |           |        |            |        |            |                                                               |                   |
| mouse             | caggtg | ---123--- | cacctg | ---6627--- | cccgtg | ---2400--- | <table border="1"><tr><td><i>Arr1</i> Exon2</td></tr></table> | <i>Arr1</i> Exon2 |
| <i>Arr1</i> Exon2 |        |           |        |            |        |            |                                                               |                   |

B

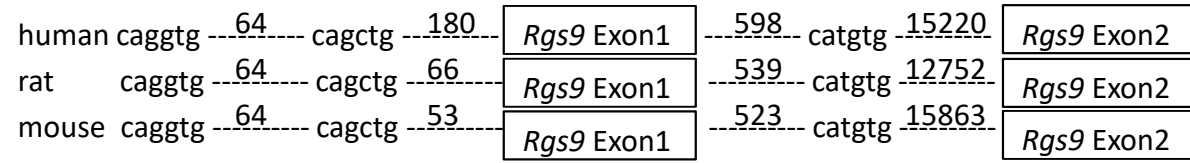

C

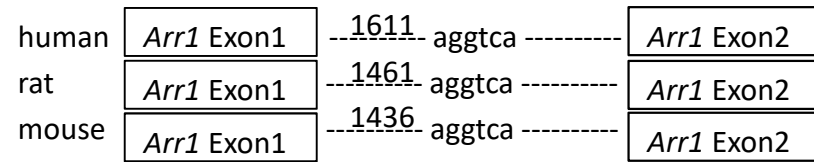

Figure 7- figure supplement 1

A

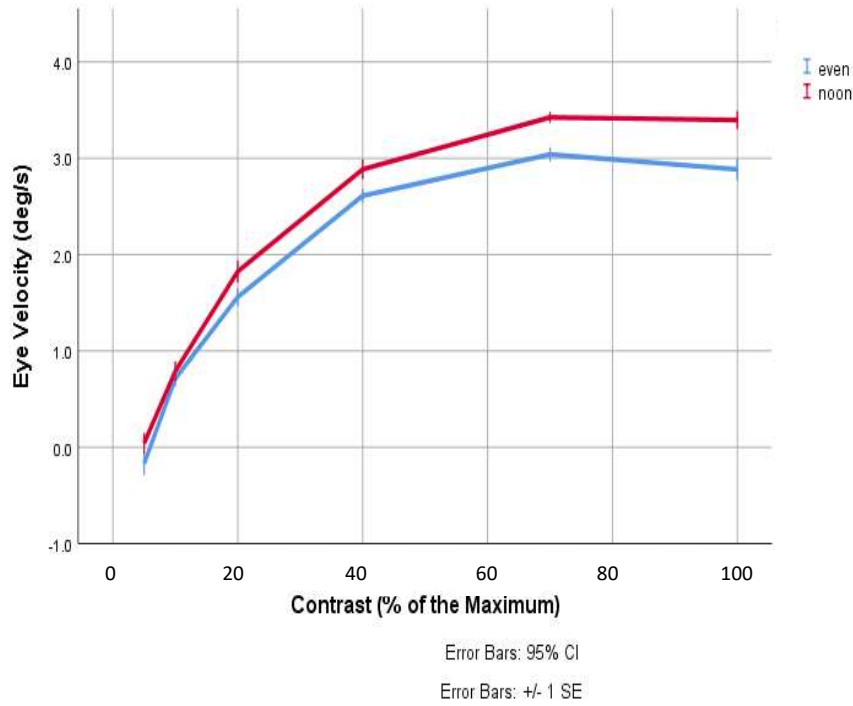

B

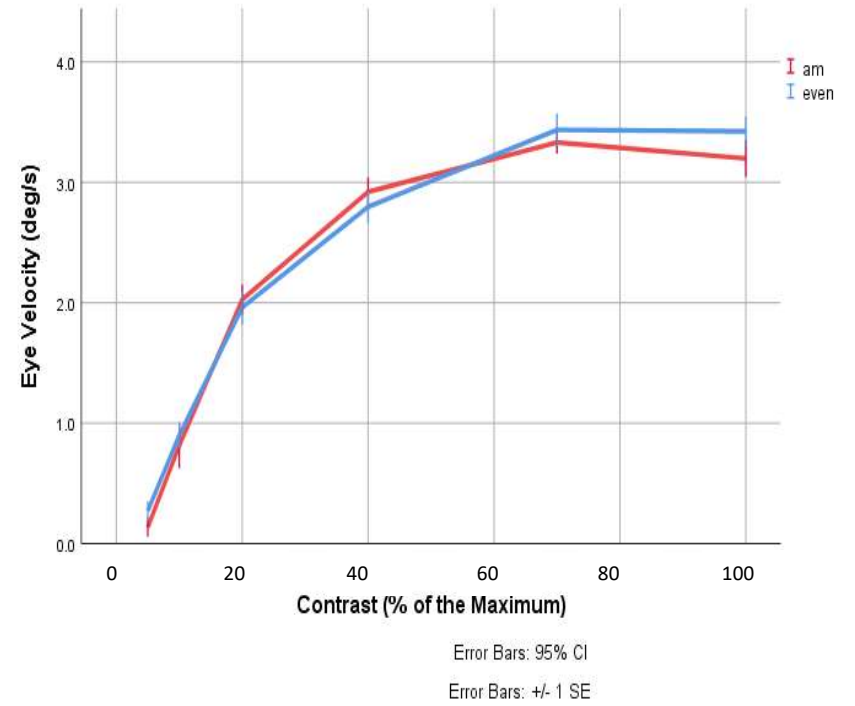



Figure 7- figure supplement 1

**OKR measurements indicate increased contrast sensitivity at noon compared to evening but similar contrast sensitivity between morning and evening.**

(A) Eye velocity as a function of stimuli contrast recorded at noon and in the evening (repeated measures ANOVA by SPSS (IBM, version 26.0)  $p=0.001$ ). “Noon” denotes recording time around ZT5,  $n=14$ . “Evening” denotes recording time around ZT13,  $n=21$ . Data are presented as mean  $\pm$  standard deviation (SD) of three independent experiments. (B) Eye velocity as a function of stimuli contrast recorded in the morning and in the evening. (Repeated measures ANOVA by SPSS (IBM, version 26.0)  $p=0.671$ ). “am” denotes recording time around ZT1,  $n=12$ . “Evening” denotes recording time around ZT13,  $n=10$ . Data are presented as mean  $\pm$  SD of three independent experiments
